# Supplementary material for: Rhodium diphosphite pincer complexes. Rare preferred in-planeolefin conformation in square-planar compounds
Source: Royal Society of Chemistry journal article supplement (doi:10.1039/b617164h), 2006-12-15
Supplement: b617164h.pdf [file b617164h.pdf]

## Supporting Information

### **Rh complexes derived from pincer diphosphite ligands. Rare preferred *in-plane* olefin conformation in square-planar complexes**

Miguel Rubio,<sup>a</sup> Andrés Suárez,<sup>a</sup> Diego del Río,<sup>a</sup> Agustín Galindo,<sup>\*b</sup> Eleuterio Álvarez<sup>a</sup>  
and Antonio Pizzano<sup>a\*</sup>

*Instituto de Investigaciones Químicas, Consejo Superior de Investigaciones Científicas  
and Universidad de Sevilla. Avda Américo Vespucio n° 49, Isla de la Cartuja. 41092  
Sevilla (Spain). Departamento de Química Inorgánica, Universidad de Sevilla, Apto  
553, 41071 Sevilla (Spain).*

#### **Representative experimental procedures.**

#### **QUEST3D-search Details.**

#### **Computational Details.**

**Table S1.** Computed energy differences of the *ip* and *u* conformers of models **I-VI**.

**Tables S2-S3.** Selected bond distances and angles for model compounds **I-VI** and **5**.

**Figures S1-S6.** Optimized structures of conformers *ip* and *u* of model complexes **I-VI**.

**Figure S7.** Superpositions of model complexes.

**Figure S8.** ORTEP view of **5a**.

**Table S4.** Crystal data and structure refinement for **5a**.

**Table S5.** Bond lengths and angles for **5a**.

**Figure S9.** ORTEP view of **5b**.

**Table S6.** Crystal data and structure refinement for **5b**.

**Table S7.** Bond lengths and angles for **5b**.

## Representative experimental procedures

**General Comments.** All reactions and manipulations were performed under nitrogen or argon, either in a Braun Labmaster 100 glovebox or using standard Schlenk-type techniques. All solvents were distilled under nitrogen using the following desiccants: Sodium-benzophenone-ketyl for benzene, diethylether (Et<sub>2</sub>O) and tetrahydrofuran (THF); sodium for petroleum ether and toluene; CaH<sub>2</sub> for dichloromethane (CH<sub>2</sub>Cl<sub>2</sub>) and NaOMe for methanol (MeOH). Chlorophosphites **1**<sup>1</sup> and Rh(Cl)(PPh<sub>3</sub>)<sub>3</sub><sup>2</sup> were prepared according to literature procedures. NMR spectra were obtained on Bruker DPX-300, DRX-400 or DRX-500 spectrometers. <sup>31</sup>P{<sup>1</sup>H} NMR shifts were referenced to external 85% H<sub>3</sub>PO<sub>4</sub>, while <sup>13</sup>C{<sup>1</sup>H} and <sup>1</sup>H shifts were referenced to the residual signals of deuterated solvents. All data are reported in ppm downfield from Me<sub>4</sub>Si. HRMS data were obtained using a Jeol JMS-SX 102A mass spectrometer. Elemental Analysis were run by the Analytical Service of the Instituto de Investigaciones Químicas. In the following section **PCP**<sup>a</sup> denotes the ligand resulting from deprotonation of **2a**.

***μ*-1,3-phenylene-bis[1,1'(3,3',5,5'-tetra-*tert*-butyl)biphen-2,2'-diyl]diphosphite (2a).** Over a solution of phosphorochloridite **1a** (4.74 g, 10 mmol) and NEt<sub>3</sub> (1.5 mL, 11 mmol) in THF (40 mL), was slowly added a resorcinol (0.55g, 5 mmol) solution in the same solvent (40 mL). After stirring for 16 h, solvent was evaporated, the residue treated with Et<sub>2</sub>O (3 x 50 mL) and filtered through a pad of neutral alumina. Removal of the solvent yielded compound **2a** as a white foamy solid (4.29 g, 87%). <sup>1</sup>H RMN (CDCl<sub>3</sub>, 400 MHz): δ 1.36 (s, 36H, 4 CMe<sub>3</sub>), 1.48 (s, 36H, 4 CMe<sub>3</sub>), 6.80 (dd, <sup>3</sup>J<sub>HH</sub> = 8.4 Hz, <sup>4</sup>J<sub>HH</sub> = 2.5 Hz, 2H, 2 H arom), 6.92 (m, 1H, H arom), 7.16 (t, <sup>3</sup>J<sub>HH</sub> = 8.4 Hz, 1H, H arom), 7.20 (d, <sup>4</sup>J<sub>HH</sub> = 2.4 Hz, 4H, 4 H arom), 7.45 (d, <sup>4</sup>J<sub>HH</sub> = 2.4 Hz, 4H, 4 H arom). <sup>31</sup>P{<sup>1</sup>H} RMN (CDCl<sub>3</sub>, 202.4 MHz): δ 137.9 (s). <sup>13</sup>C{<sup>1</sup>H} RMN (CDCl<sub>3</sub>, 100.6 MHz): δ 31.3 (brs, 4 CMe<sub>3</sub>), 31.5 (s, 4 CMe<sub>3</sub>), 34.7 (4 CMe<sub>3</sub>), 35.5 (4 CMe<sub>3</sub>), 112.8 (t, J<sub>PC</sub> = 8 Hz, CH arom), 115.8 (d, J<sub>PC</sub> = 9 Hz, 2 CH arom), 124.4 (s, 4 CH arom), 126.6 (s, 4 CH arom), 130.0 (s, CH arom), 132.8 (d, J<sub>PC</sub> = 2 Hz, 4 C<sub>q</sub> arom), 140.3 (s, 4 C<sub>q</sub> arom), 145.3

<sup>1</sup> (a) G. J. H. Buisman, P. C. J. Kamer, P. W. N. M. van Leeuwen, *Tetrahedron: Asymmetry* 1993, **4**, 1625; (b) A. Suárez, M. A. Méndez-Rojas and A. Pizzano, *Organometallics* 2002, **21** 4611.

<sup>2</sup> A. Osborn, F. H. Jardine, J. F. Young, G. Wilkinson, *J. Chem. Soc. (A)* 1966, 1711.

(d,  $J_{PC} = 6$  Hz, 4  $C_q$  arom), 146.8 (s, 4  $C_q$  arom), 153.2 (d,  $J_{PC} = 7$  Hz, 2  $C_q$  arom).  
HRMS (FAB):  $m/z$  986.5755,  $[M]^+$  (exact mass calculated for  $C_{62}H_{84}O_6P_2$ : 986.5743)

**Rh(PCP<sup>a</sup>)(PPh<sub>3</sub>) (3a).** Over a suspension of RhCl(PPh<sub>3</sub>)<sub>3</sub> (0.46 g, 0.5 mmol) in THF (5 mL) was added diphosphite **2a** (0.49 g, 0.5 mmol) dissolved in THF (10 mL). The mixture was heated over 24 h at 70°C. An excess of NEt<sub>3</sub> (0.1 mL) was added and the mixture vigorously stirred for 24 h. Solvent was removed under reduced pressure and the resulting solid was purified by column chromatography on silicagel (AcOEt:Hex 1:20) yielding **3a** as an orange solid (0.58 g, 85%). <sup>1</sup>H RMN (CDCl<sub>3</sub>, 400 MHz): δ 1.20 (s, 36H, 4 CMe<sub>3</sub>), 1.38 (s, 36H, 4 CMe<sub>3</sub>), 6.42 (d, <sup>3</sup>J<sub>HH</sub> = 8 Hz, 2H, 2 H arom), 6.71 (t, <sup>3</sup>J<sub>HH</sub> = 7 Hz, 6H, 6 H arom), 6.84 (t, 1H, <sup>3</sup>J<sub>HH</sub> = 8 Hz, H arom), 6.97 (t, <sup>3</sup>J<sub>HH</sub> = 7 Hz, 3H, 3 H arom), 7.10 (sa, 4H, 4 H arom), 7.33 (sa, 4H, 4 H arom), 7.35 (d, <sup>3</sup>J<sub>HH</sub> = 7 Hz, 6H, 6 H arom). <sup>31</sup>P{<sup>1</sup>H} RMN (CDCl<sub>3</sub>, 162.1 MHz): δ 28.6 (td,  $J_{PRh} = 129$  Hz,  $J_{PP} = 44$  Hz, P-C), 171.5 (dd,  $J_{PRh} = 265$  Hz, P-O). <sup>13</sup>C{<sup>1</sup>H} RMN (CDCl<sub>3</sub>, 75.5 MHz): δ 31.8 (s, 4 CMe<sub>3</sub>), 31.9 (s, 4 CMe<sub>3</sub>), 35.0 (4 CMe<sub>3</sub>), 35.8 (4 CMe<sub>3</sub>), 105.3 (t,  $J_{PC} = 8$  Hz, 2 CH arom), 124.6 (s, 4 CH arom), 126.0 (s, CH arom), 127.6 (s, 4 CH arom), 128.0 (d,  $J_{PC} = 9$  Hz, 6 CH arom), 129.0 (s, 3 CH arom), 131.4 (s, 4  $C_q$  arom), 134.0 (d,  $J_{PC} = 13$  Hz, 6 CH arom), 137.7 (d,  $J_{PC} = 36$  Hz, 3  $C_q$  arom), 140.1 (s, 4  $C_q$  arom), 140.7 (ddd,  $J_{PC} = 58$ , 14 Hz,  $J_{RhC} = 28$  Hz,  $C_q$  arom), 146.6 (s, 4  $C_q$  arom), 147.4 (t,  $J_{PC} = 5$  Hz, 4 OC<sub>q</sub> arom), 159.5 (t,  $J_{PC} = 13$  Hz, 2 OC<sub>q</sub> arom). Anal. Calcd for: C<sub>80</sub>H<sub>98</sub>O<sub>6</sub>P<sub>3</sub>Rh: C 71.1, H 7.3. Found C 70.6, H 7.4.

**Rh(PCP<sup>a</sup>)(CO) (4a).** To a solution of compound **3a** (0.04 g, 0.03 mmol) in THF (10 mL) was added an excess of elemental selenium (0.005 g, 0.06 mmol). The mixture was introduced in a Fischer-Porter vessel and charged with 2 atm of CO. After 1h the reactor was vented and solvent removed. The solution was concentrated until started turbidity and filtered. After standing for 24 h compound **4a** was collected as yellow crystals (0.020 g, 60%). IR (nujol mull, cm<sup>-1</sup>): 2017 ( $\nu_{CO}$ ). <sup>1</sup>H RMN (CDCl<sub>3</sub>, 500 MHz): δ 1.33 (s, 36H, 4 CMe<sub>3</sub>), 1.40 (s, 36H, 4 CMe<sub>3</sub>), 6.64 (d, <sup>3</sup>J<sub>HH</sub> = 8 Hz, 2H, 2 H arom), 7.05 (t, <sup>3</sup>J<sub>HH</sub> = 8 Hz, 1H, H arom), 7.20 (d, <sup>4</sup>J<sub>HH</sub> = 2 Hz, 4H, 4 H arom), 7.45 (d, <sup>4</sup>J<sub>HH</sub> = 2 Hz, 4H, 4 H arom). <sup>31</sup>P{<sup>1</sup>H} RMN (CDCl<sub>3</sub>, 162.1 MHz): δ 167.3 (d,  $J_{PRh} = 256$  Hz). <sup>13</sup>C{<sup>1</sup>H} RMN (CDCl<sub>3</sub>, 125.8 MHz): δ 31.5 (s, 4 CMe<sub>3</sub>), 31.7 (s, 4 CMe<sub>3</sub>), 34.7 (4 CMe<sub>3</sub>), 35.7 (4 CMe<sub>3</sub>), 106.1 (t,  $J_{PC} = 8$  Hz, 2 CH arom), 125.0 (s, 4 CH arom), 126.6 (s, 4 CH arom), 129.5 (s, CH arom), 131.6 (s, 4  $C_q$  arom), 140.2 (m,  $C_q$  arom), 140.3 (s, 4  $C_q$  arom), 145.1 (s, 4 OC<sub>q</sub> arom), 147.6 (s, 4  $C_q$  arom), 160.4 (t,  $J_{PC} = 14$  Hz, 2 OC<sub>q</sub>

arom), 191.8 (dt,  $J_{\text{RhC}} = 58$  Hz,  $J_{\text{PC}} = 16$  Hz, CO). Anal. Calcd for:  $\text{C}_{63}\text{H}_{83}\text{O}_7\text{P}_2\text{Rh}$ : C 67.7, H 7.5. Found: C 67.9, H 7.9.

**Rh(PCP<sup>a</sup>)( $\eta^2$ -C<sub>2</sub>H<sub>4</sub>) (5a).** In a Fischer-Porter vessel compound **3a** (0.108 g, 0.08 mmol) and Se (0.010 g, 0.13 mmol) were added to THF (10 mL). The reactor was charged with 4 atm of C<sub>2</sub>H<sub>4</sub> and heated at 40°C. Reaction completion was observed after 4 d. Solvent was removed under reduce pressure and the remaining solid extracted with *n*-pentane (3x10 mL). Further filtration and concentration yielded **5a** as orange crystals (0.040 g, 45%). <sup>1</sup>H RMN (CD<sub>2</sub>Cl<sub>2</sub>, 400 MHz):  $\delta$  1.30 (s, 36H, 4 CMe<sub>3</sub>), 1.39 (s, 36H, 4 CMe<sub>3</sub>), 2.82 (brs, 4H, C<sub>2</sub>H<sub>4</sub>), 6.68 (d,  $^3J_{\text{HH}} = 8$  Hz, 2H, 2 H arom), 7.01 (t,  $^3J_{\text{HH}} = 8$  Hz, 1H, H arom), 7.28 (d,  $^4J_{\text{HH}} = 2.5$  Hz, 4H, 4 H arom), 7.50 (d,  $^4J_{\text{HH}} = 2.5$  Hz, 4H, 4 H arom). <sup>31</sup>P{<sup>1</sup>H} RMN (CD<sub>2</sub>Cl<sub>2</sub>, 162.1 MHz):  $\delta$  177.3 (d,  $J_{\text{PRh}} = 253$  Hz). <sup>13</sup>C{<sup>1</sup>H} RMN (CDCl<sub>3</sub>, 75.5 MHz):  $\delta$  31.5 (s, 4 CMe<sub>3</sub>), 31.5 (s, 4 CMe<sub>3</sub>), 34.7 (4 CMe<sub>3</sub>), 35.6 (4 CMe<sub>3</sub>), 58.8 (brs, C<sub>2</sub>H<sub>4</sub>), 105.7 (t,  $J_{\text{PC}} = 9$  Hz, 2 CH arom), 124.8 (s, 4 CH arom), 125.2 (s, CH arom), 126.7 (s, 4 CH arom), 131.6 (s, 4 C<sub>q</sub> arom), 139.9 (dt,  $J_{\text{RhC}} = 29$  Hz,  $J_{\text{PC}} = 16$  Hz, C<sub>q</sub> arom), 140.1 (s, 4 C<sub>q</sub> arom), 145.5 (brs, 4 OC<sub>q</sub> arom), 147.4 (s, 4 C<sub>q</sub> arom), 158.8 (t,  $J_{\text{PC}} = 16$  Hz, 2 OC<sub>q</sub> arom). Anal. Calcd for:  $\text{C}_{64}\text{H}_{87}\text{O}_6\text{P}_2\text{Rh}$ : C 68.8; H 7.8. Found: C 69.0, H 8.2.

### QUEST3D-search Details

The QUEST3D searches commented in the text have been carried out on the Cambridge Structural Database (updated May 2006) and have the following details:

(a) Analysis of the P-M-P angles in square-planar transition metal complexes containing a pincer ligand (see chart, E is any heteroatom). The CSD search with restrictions (not disordered, no errors,  $R \leq 0.075$ ) gave a mean value of 165° (57 fragments, 47 hits).

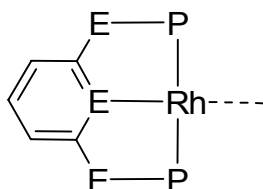

(b) Analysis of the C-C distance of ethylene rhodium complexes. The CSD search without any restriction, gave a mean value of 1.39 Å (139 fragments, 64 hits). A similar value (1.38 Å for 115 fragments, 52 hits) was obtained with restrictions (not disordered, no errors,  $R \leq 0.075$ ).

## Computational Details

The electronic structures and geometries of the model complexes **I-VI** were computed within the density functional theory at the B3LYP level.<sup>3</sup> The Rh atom was described with the Stuttgart Relativistic Small Core ECP basis set<sup>4</sup> and a polarization function. In all cases the atoms corresponding to the pincer ligand are described using a TZVP basis set. For the more complex models **IV-VI**, the biphenyl groups are described using a DZVP basis set. All the calculations were performed using the Gaussian03 package.<sup>5</sup> Figures were drawn using Molekel.<sup>6</sup> XYZ coordinates of all optimized complexes are available upon request.

---

<sup>3</sup> (a) A. D. *J. Chem. Phys.* 1993, **98**, 5648. (b) C. T. Lee, W. T. Yang, R. G. Parr, *Phys. Rev. B* **1988**, *37*, 785.

<sup>4</sup> M. Dolg, H. Stoll, H. Preuss, R. M. Pitzer, *J. Phys. Chem.* **1993**, *97*, 5852.

<sup>5</sup> Gaussian 03, Revision C.02, M. J. Frisch, G. W. Trucks, H. B. Schlegel, G. E. Scuseria, M. A. Robb, J. R. Cheeseman, J. A. Montgomery, Jr., T. Vreven, K. N. Kudin, J. C. Burant, J. M. Millam, S. S. Iyengar, J. Tomasi, V. Barone, B. Mennucci, M. Cossi, G. Scalmani, N. Rega, G. A. Petersson, H. Nakatsuji, M. Hada, M. Ehara, K. Toyota, R. Fukuda, J. Hasegawa, M. Ishida, T. Nakajima, Y. Honda, O. Kitao, H. Nakai, M. Klene, X. Li, J. E. Knox, H. P. Hratchian, J. B. Cross, V. Bakken, C. Adamo, J. Jaramillo, R. Gomperts, R. E. Stratmann, O. Yazyev, A. J. Austin, R. Cammi, C. Pomelli, J. W. Ochterski, P. Y. Ayala, K. Morokuma, G. A. Voth, P. Salvador, J. J. Dannenberg, V. G. Zakrzewski, S. Dapprich, A. D. Daniels, M. C. Strain, O. Farkas, D. K. Malick, A. D. Rabuck, K. Raghavachari, J. B. Foresman, J. V. Ortiz, Q. Cui, A. G. Baboul, S. Clifford, J. Cioslowski, B. B. Stefanov, G. Liu, A. Liashenko, P. Piskorz, I. Komaromi, R. L. Martin, D. J. Fox, T. Keith, M. A. Al-Laham, C. Y. Peng, A. Nanayakkara, M. Challacombe, P. M. W. Gill, B. Johnson, W. Chen, M. W. Wong, C. Gonzalez, and J. A. Pople, Gaussian, Inc., Wallingford CT, 2004.

<sup>6</sup> S. Portmann, H. P. Luthi, *Chimia* **2000**, *54*, 766.

**Table S1.** Computed energy differences of the *ip* and *u* conformers of models **I-VI**.

| Model Complex                                                                                                                                                         | Relative Energy <sup>a</sup> |
|-----------------------------------------------------------------------------------------------------------------------------------------------------------------------|------------------------------|
| RhPh(PH <sub>3</sub> ) <sub>2</sub> (C <sub>2</sub> H <sub>4</sub> ) ( <b>I</b> )                                                                                     | +10.8                        |
| Rh{C <sub>6</sub> H <sub>3</sub> (OPH <sub>2</sub> ) <sub>2</sub> }(C <sub>2</sub> H <sub>4</sub> ) ( <b>II</b> )                                                     | -0.9                         |
| Rh{C <sub>6</sub> H <sub>3</sub> (CH <sub>2</sub> PH <sub>2</sub> ) <sub>2</sub> }(C <sub>2</sub> H <sub>4</sub> ) ( <b>III</b> )                                     | +1.0                         |
| Rh{C <sub>6</sub> H <sub>3</sub> (OP(OC <sub>6</sub> H <sub>4</sub> -OC <sub>6</sub> H <sub>4</sub> ) <sub>2</sub> }(C <sub>2</sub> H <sub>4</sub> ) ( <b>IV</b> )    | -0.1                         |
| Rh{C <sub>6</sub> H <sub>3</sub> (OP(OC <sub>6</sub> H <sub>3</sub> Me-OC <sub>6</sub> H <sub>4</sub> ) <sub>2</sub> }(C <sub>2</sub> H <sub>4</sub> ) ( <b>V</b> )   | -0.6                         |
| Rh{C <sub>6</sub> H <sub>3</sub> (OP(OC <sub>6</sub> H <sub>3</sub> tBu-OC <sub>6</sub> H <sub>4</sub> ) <sub>2</sub> }(C <sub>2</sub> H <sub>4</sub> ) ( <b>VI</b> ) | <sup>b</sup>                 |

<sup>a</sup> A negative value for the relative energy indicates that the *ip* conformer is the most stable. <sup>b</sup> *u* conformation does not optimize.

**Table S2.** Selected bond distances and angles for model compounds **I-III**.

| Selected bond distances<br>(Å) and angles (°)       | Calculated                                                                       |          |                                                                                                                   |          |                                                                                                                                   |          |
|-----------------------------------------------------|----------------------------------------------------------------------------------|----------|-------------------------------------------------------------------------------------------------------------------|----------|-----------------------------------------------------------------------------------------------------------------------------------|----------|
|                                                     | RhPh(PH <sub>3</sub> ) <sub>2</sub> (C <sub>2</sub> H <sub>4</sub> )<br><b>I</b> |          | Rh{C <sub>6</sub> H <sub>3</sub> (OPH <sub>2</sub> ) <sub>2</sub> } (C <sub>2</sub> H <sub>4</sub> )<br><b>II</b> |          | Rh{C <sub>6</sub> H <sub>3</sub> (CH <sub>2</sub> PH <sub>2</sub> ) <sub>2</sub> } (C <sub>2</sub> H <sub>4</sub> )<br><b>III</b> |          |
|                                                     | <i>ip</i>                                                                        | <i>u</i> | <i>ip</i>                                                                                                         | <i>u</i> | <i>ip</i>                                                                                                                         | <i>u</i> |
| Rh-C <sub>(ethylene)</sub>                          | 2.335                                                                            | 2.239    | 2.250                                                                                                             | 2.255    | 2.260                                                                                                                             | 2.249    |
| Rh-C <sub>ipso</sub>                                | 2.144                                                                            | 2.132    | 2.065                                                                                                             | 2.053    | 2.108                                                                                                                             | 2.096    |
| Rh-P                                                | 2.326                                                                            | 2.308    | 2.260                                                                                                             | 2.273    | 2.283                                                                                                                             | 2.288    |
| C-C (ethylene)                                      | 1.363                                                                            | 1.386    | 1.383                                                                                                             | 1.379    | 1.377                                                                                                                             | 1.380    |
| P-Rh-P                                              | 174.6                                                                            | 176.9    | 155.4                                                                                                             | 157.1    | 158.5                                                                                                                             | 162.6    |
| Plane Rh-PCP/ plane Rh-<br>CC <sub>(ethylene)</sub> | 0                                                                                | 90       | 0                                                                                                                 | 90       | 14.8                                                                                                                              | 76.3     |

**Table S3.** Selected bond distances and angles for model compounds **IV-VI** and comparison with experimental data.

|                                                     | Calculated   |             |             |            |              | Experimental             |                        |
|-----------------------------------------------------|--------------|-------------|-------------|------------|--------------|--------------------------|------------------------|
|                                                     | <i>IV-ip</i> | <i>IV-u</i> | <i>V-ip</i> | <i>V-u</i> | <i>VI-ip</i> | <b>5a</b>                | <b>5b</b>              |
| <b>Bond distances (Å)</b>                           |              |             |             |            |              |                          |                        |
| Rh-C <sub>(ethylene)</sub>                          | 2.286        | 2.282       | 2.288       | 2.284      | 2.285        | 2.2184(14)<br>2.2353(14) | 2.228(3)<br>2.230(3)   |
| Rh-C <sub>ipso</sub>                                | 2.057        | 2.046       | 2.057       | 2.048      | 2.057        | 2.0233(12)               | 2.019(3)               |
| Rh-P                                                | 2.259        | 2.265       | 2.259       | 2.266      | 2.259        | 2.2076(3)<br>2.2165(3)   | 2.2237(7)<br>2.2096(7) |
| C-C (ethylene)                                      | 1.374        | 1.372       | 1.374       | 1.372      | 1.373        | 1.377(2)                 | 1.353(4)               |
| <b>Angles (°)</b>                                   |              |             |             |            |              |                          |                        |
| P-Rh-P                                              | 155.1        | 156.9       | 155.0       | 157.9      | 155.1        | 155.490(13)              | 155.37(3)              |
| Plane Rh-PCP/ plane Rh-<br>CC <sub>(ethylene)</sub> | 4.1          | 82.7        | 8.8         | 86.9       | 7.9          | 7.4                      | 13.0                   |



**Figure S1.** Optimized structures of conformers *ip* (right) and *u* (left) of model complex RhPh(PH<sub>3</sub>)<sub>2</sub>(C<sub>2</sub>H<sub>4</sub>) (**I**).

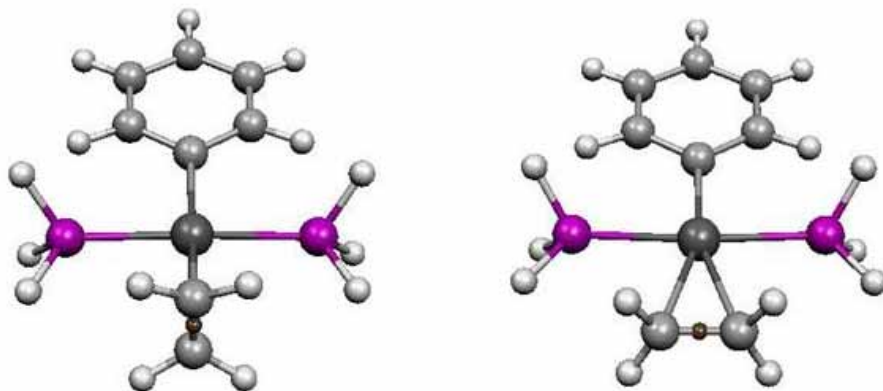

**Figure S2.** Optimized structures of conformers *ip* (right) and *u* (left) of model complex Rh{C<sub>6</sub>H<sub>3</sub>(OPH<sub>2</sub>)<sub>2</sub>} (C<sub>2</sub>H<sub>4</sub>) (**II**).

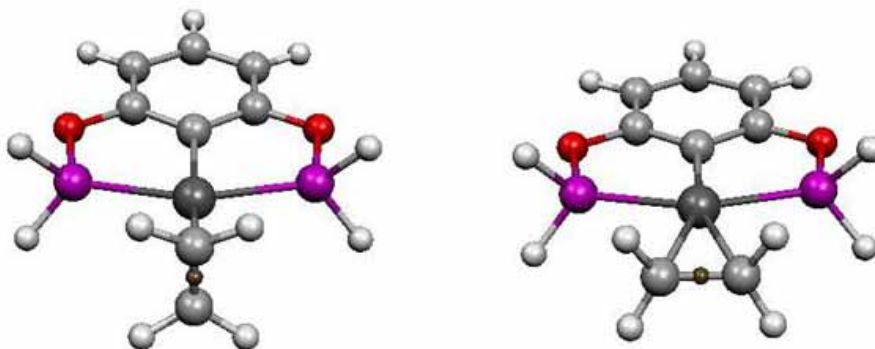

**Figure S3.** Optimized structures of conformers *ip* (right) and *u* (left) of model complex Rh{C<sub>6</sub>H<sub>3</sub>(CH<sub>2</sub>PH<sub>2</sub>)<sub>2</sub>} (C<sub>2</sub>H<sub>4</sub>) (**III**).

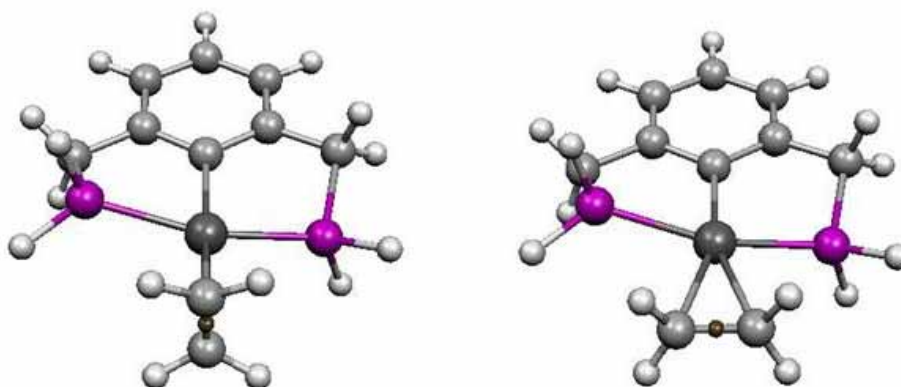

**Figure S4.** Optimized structures of conformers *ip* (top) and *u* (bottom) of model complex  $\text{Rh}\{\text{C}_6\text{H}_3(\text{OP}(\text{OC}_6\text{H}_4\text{-OC}_6\text{H}_4)_2)\}(\text{C}_2\text{H}_4)$  (**IV**).

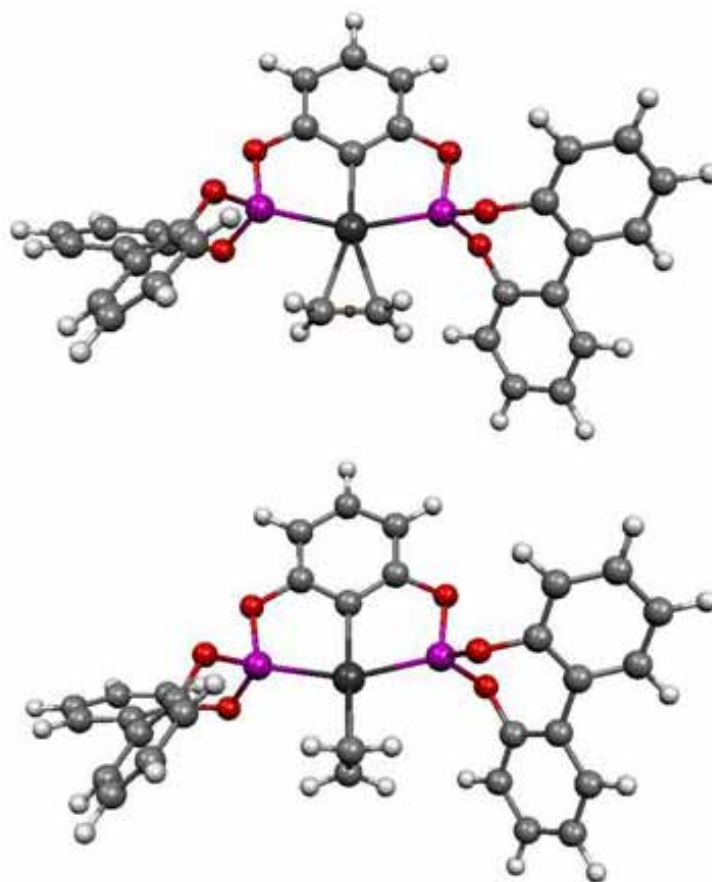

**Figure S5.** Optimized structures of the conformers *ip* (top) and *u* (bottom) of model complex  $\text{Rh}\{\text{C}_6\text{H}_3(\text{OP}(\text{OC}_6\text{H}_3\text{Me}-\text{OC}_6\text{H}_4)_2)\}(\text{C}_2\text{H}_4)$  (**V**).

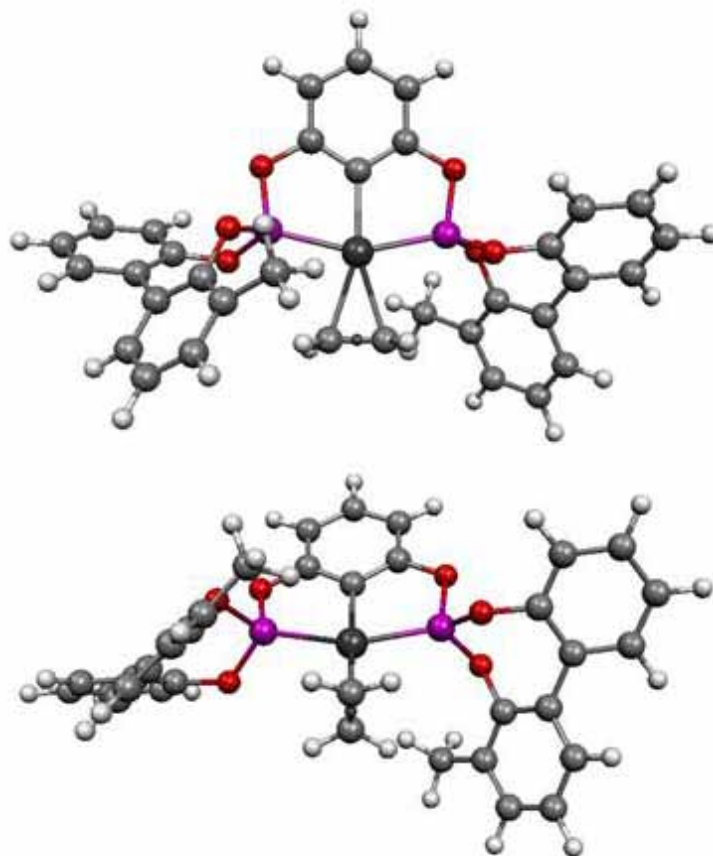

**Figure S6.** Optimized structures of the conformer *ip* of model complex  
 $\text{Rh}\{\text{C}_6\text{H}_3(\text{OP}(\text{OC}_6\text{H}_3\text{-}t\text{-Bu-OC}_6\text{H}_4)_2)\}(\text{C}_2\text{H}_4)$  (VI)

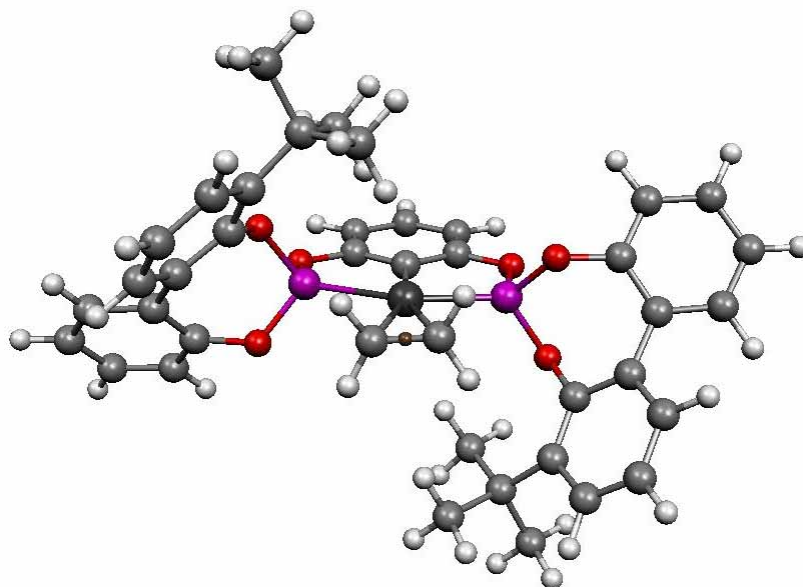

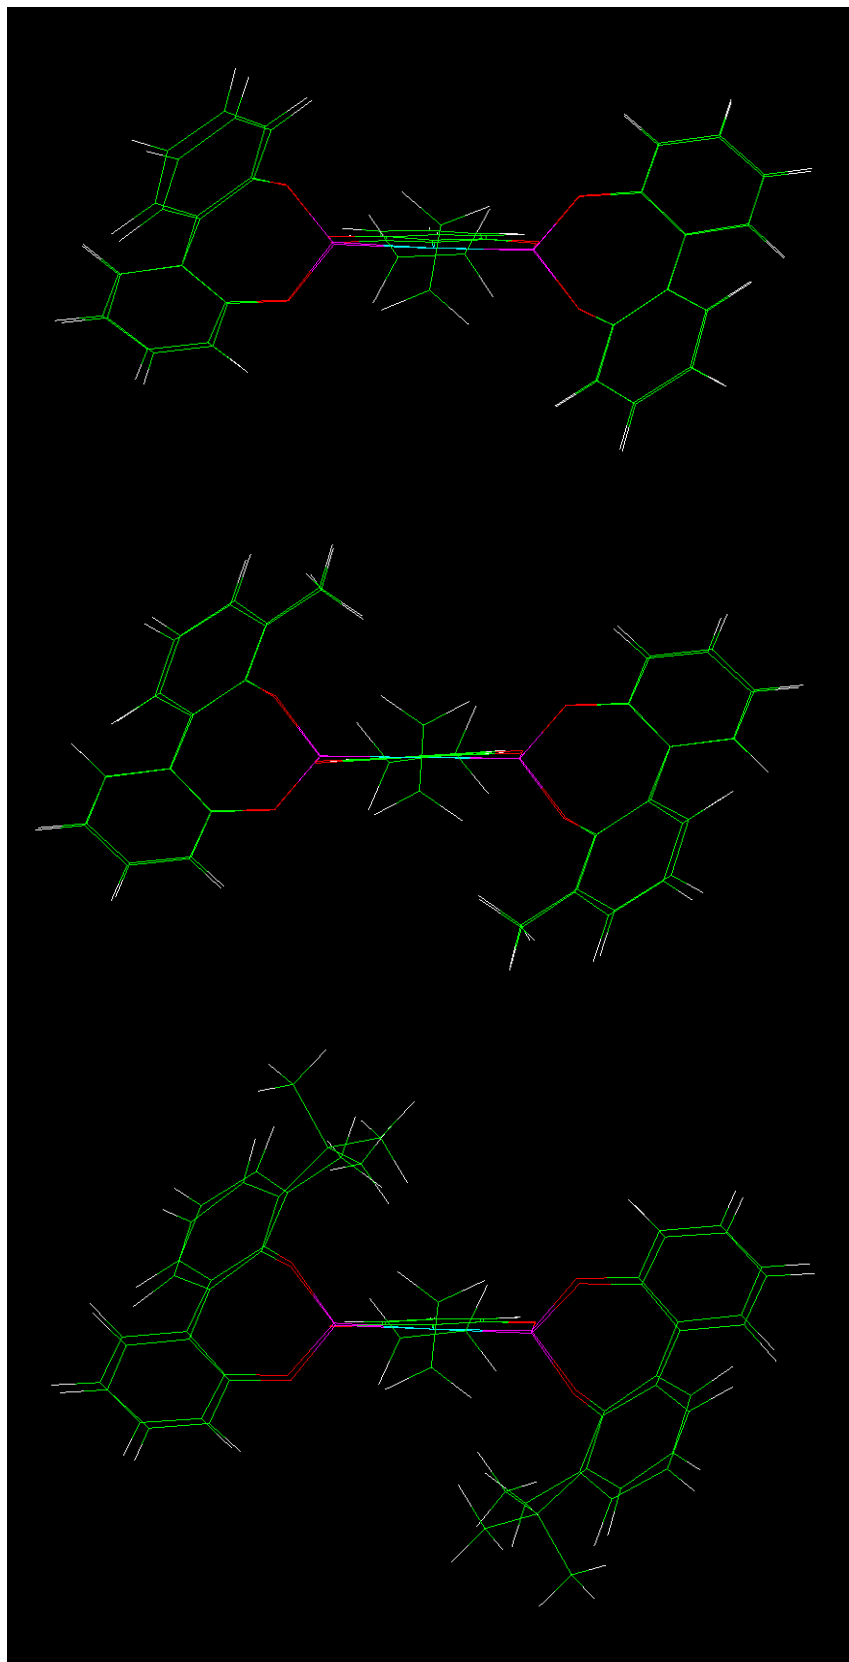

**Figure S7.** Superposition of ethylene conformers: **IV-*ip*** and **IV-*u*** (top), **V-*ip*** and **V-*u*** (middle), **VI-*ip*** and **V-*u*** (bottom).

**Figure S8.** ORTEP view (30% ellipsoids) of one single enantiomer of the racemate present in the crystallographic unit cell of **5a**. H atoms (except for ethylene) and solvent have been omitted for clarity.

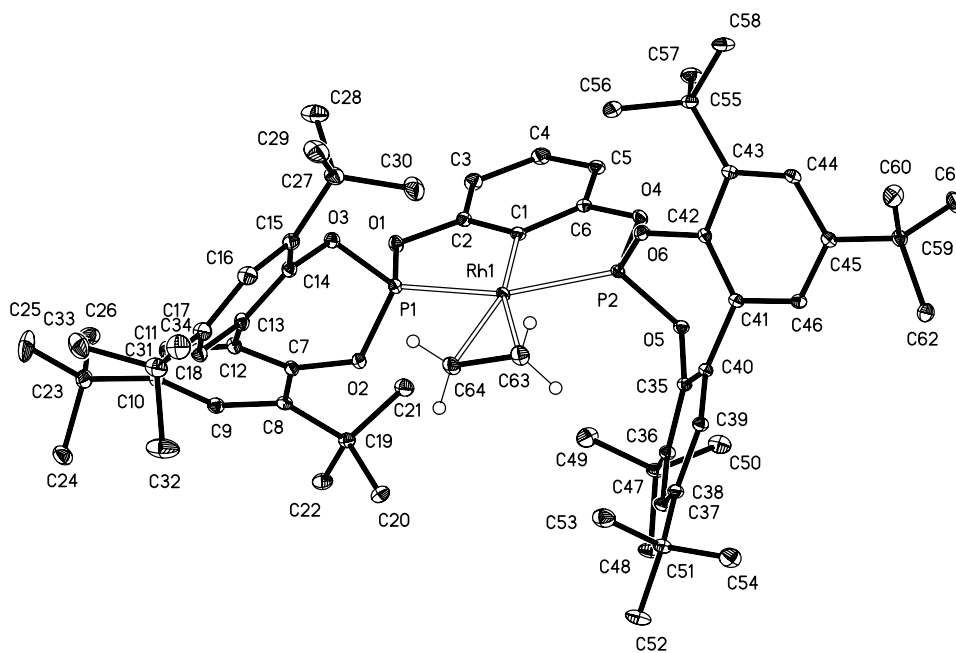

**Table S4.** Crystal data and structure refinement for **5a**.

|                                   |                                                                                                                                                                         |
|-----------------------------------|-------------------------------------------------------------------------------------------------------------------------------------------------------------------------|
| Empirical formula                 | C <sub>69</sub> H <sub>99</sub> O <sub>6</sub> P <sub>2</sub> Rh<br>[C <sub>64</sub> H <sub>87</sub> O <sub>6</sub> P <sub>2</sub> Rh, C <sub>5</sub> H <sub>12</sub> ] |
| Formula weight                    | 1189.33                                                                                                                                                                 |
| Temperature                       | 100(2) K                                                                                                                                                                |
| Wavelength                        | 0.71073 Å                                                                                                                                                               |
| Crystal system                    | Monoclinic                                                                                                                                                              |
| Space group                       | P2 <sub>1</sub> /c                                                                                                                                                      |
| Unit cell dimensions              | a = 17.2239(5) Å      α = 90°.<br>b = 19.2234(6) Å      β = 97.7050(10)°.<br>c = 20.3456(6) Å      γ = 90°.                                                             |
| Volume                            | 6675.6(3) Å <sup>3</sup>                                                                                                                                                |
| Z                                 | 4                                                                                                                                                                       |
| Density (calculated)              | 1.183 Mg/m <sup>3</sup>                                                                                                                                                 |
| Absorption coefficient            | 0.351 mm <sup>-1</sup>                                                                                                                                                  |
| F(000)                            | 2544                                                                                                                                                                    |
| Crystal size                      | 0.30 x 0.26 x 0.24 mm <sup>3</sup>                                                                                                                                      |
| Theta range for data collection   | 2.35 to 30.52°.                                                                                                                                                         |
| Index ranges                      | -20 ≤ h ≤ 24, -27 ≤ k ≤ 26, -29 ≤ l ≤ 29                                                                                                                                |
| Reflections collected             | 153626                                                                                                                                                                  |
| Independent reflections           | 20381 [R(int) = 0.0346]                                                                                                                                                 |
| Completeness to theta = 30.52°    | 99.9 %                                                                                                                                                                  |
| Absorption correction             | Semi-empirical from equivalents                                                                                                                                         |
| Max. and min. transmission        | 0.9205 and 0.9020                                                                                                                                                       |
| Refinement method                 | Full-matrix least-squares on F <sup>2</sup>                                                                                                                             |
| Data / restraints / parameters    | 20381 / 35 / 719                                                                                                                                                        |
| Goodness-of-fit on F <sup>2</sup> | 1.052                                                                                                                                                                   |
| Final R indices [I > 2σ(I)]       | R1 = 0.0311, wR2 = 0.0797                                                                                                                                               |
| R indices (all data)              | R1 = 0.0392, wR2 = 0.0850                                                                                                                                               |
| Largest diff. peak and hole       | 0.883 and -0.796 e.Å <sup>-3</sup>                                                                                                                                      |

**Table S5.** Bond lengths [Å] and angles [°] for **5a**

|             |            |              |            |
|-------------|------------|--------------|------------|
| Rh(1)-C(1)  | 2.0233(12) | C(12)-C(13)  | 1.4853(18) |
| Rh(1)-P(1)  | 2.2076(3)  | C(13)-C(18)  | 1.3972(19) |
| Rh(1)-P(2)  | 2.2165(3)  | C(13)-C(14)  | 1.3981(18) |
| Rh(1)-C(64) | 2.2184(14) | C(14)-C(15)  | 1.4022(18) |
| Rh(1)-C(63) | 2.2353(14) | C(15)-C(16)  | 1.4009(19) |
| P(1)-O(2)   | 1.6053(9)  | C(15)-C(27)  | 1.5455(19) |
| P(1)-O(1)   | 1.6187(10) | C(16)-C(17)  | 1.395(2)   |
| P(1)-O(3)   | 1.6194(10) | C(16)-H(16)  | 0.9500     |
| P(2)-O(6)   | 1.5974(10) | C(17)-C(18)  | 1.3888(19) |
| P(2)-O(4)   | 1.6220(10) | C(17)-C(31)  | 1.530(2)   |
| P(2)-O(5)   | 1.6234(10) | C(18)-H(18)  | 0.9500     |
| O(1)-C(2)   | 1.4030(15) | C(19)-C(22)  | 1.5390(19) |
| O(2)-C(7)   | 1.4039(15) | C(19)-C(21)  | 1.5396(19) |
| O(3)-C(14)  | 1.4015(16) | C(19)-C(20)  | 1.5446(19) |
| O(4)-C(6)   | 1.4051(15) | C(20)-H(20A) | 0.9800     |
| O(5)-C(35)  | 1.4036(15) | C(20)-H(20B) | 0.9800     |
| O(6)-C(42)  | 1.3941(15) | C(20)-H(20C) | 0.9800     |
| C(1)-C(2)   | 1.3947(18) | C(21)-H(21A) | 0.9800     |
| C(1)-C(6)   | 1.3947(17) | C(21)-H(21B) | 0.9799     |
| C(2)-C(3)   | 1.3896(18) | C(21)-H(21C) | 0.9800     |
| C(3)-C(4)   | 1.395(2)   | C(22)-H(22A) | 0.9800     |
| C(3)-H(3)   | 0.9500     | C(22)-H(22B) | 0.9800     |
| C(4)-C(5)   | 1.389(2)   | C(22)-H(22C) | 0.9800     |
| C(4)-H(4)   | 0.9500     | C(23)-C(25)  | 1.533(2)   |
| C(5)-C(6)   | 1.3870(18) | C(23)-C(26)  | 1.536(2)   |
| C(5)-H(5)   | 0.9500     | C(23)-C(24)  | 1.536(2)   |
| C(7)-C(12)  | 1.3915(18) | C(24)-H(24A) | 0.9800     |
| C(7)-C(8)   | 1.4030(17) | C(24)-H(24B) | 0.9800     |
| C(8)-C(9)   | 1.3984(18) | C(24)-H(24C) | 0.9800     |
| C(8)-C(19)  | 1.5389(18) | C(25)-H(25A) | 0.9800     |
| C(9)-C(10)  | 1.4036(19) | C(25)-H(25B) | 0.9800     |
| C(9)-H(9)   | 0.9500     | C(25)-H(25C) | 0.9800     |
| C(10)-C(11) | 1.3900(19) | C(26)-H(26A) | 0.9800     |
| C(10)-C(23) | 1.5343(19) | C(26)-H(26B) | 0.9800     |
| C(11)-C(12) | 1.4016(18) | C(26)-H(26C) | 0.9800     |
| C(11)-H(11) | 0.9500     | C(27)-C(30)  | 1.528(2)   |



|              |            |              |            |
|--------------|------------|--------------|------------|
| C(27)-C(29)  | 1.533(2)   | C(43)-C(55)  | 1.5391(18) |
| C(27)-C(28)  | 1.549(2)   | C(44)-C(45)  | 1.4000(18) |
| C(28)-H(28A) | 0.9800     | C(44)-H(44)  | 0.9500     |
| C(28)-H(28B) | 0.9800     | C(45)-C(46)  | 1.3896(17) |
| C(28)-H(28C) | 0.9800     | C(45)-C(59)  | 1.5330(18) |
| C(29)-H(29A) | 0.9800     | C(46)-H(46)  | 0.9499     |
| C(29)-H(29B) | 0.9800     | C(47)-C(49)  | 1.535(2)   |
| C(29)-H(29C) | 0.9800     | C(47)-C(48)  | 1.5372(18) |
| C(30)-H(30A) | 0.9800     | C(47)-C(50)  | 1.541(2)   |
| C(30)-H(30B) | 0.9800     | C(48)-H(48A) | 0.9800     |
| C(30)-H(30C) | 0.9800     | C(48)-H(48B) | 0.9800     |
| C(31)-C(34)  | 1.534(2)   | C(48)-H(48C) | 0.9800     |
| C(31)-C(33)  | 1.537(2)   | C(49)-H(49A) | 0.9800     |
| C(31)-C(32)  | 1.539(2)   | C(49)-H(49B) | 0.9800     |
| C(32)-H(32A) | 0.9800     | C(49)-H(49C) | 0.9800     |
| C(32)-H(32B) | 0.9800     | C(50)-H(50A) | 0.9801     |
| C(32)-H(32C) | 0.9800     | C(50)-H(50B) | 0.9800     |
| C(33)-H(33A) | 0.9800     | C(50)-H(50C) | 0.9800     |
| C(33)-H(33B) | 0.9800     | C(51)-C(52)  | 1.5315(18) |
| C(33)-H(33C) | 0.9800     | C(51)-C(54)  | 1.535(2)   |
| C(34)-H(34A) | 0.9800     | C(51)-C(53)  | 1.539(2)   |
| C(34)-H(34B) | 0.9800     | C(52)-H(52A) | 0.9800     |
| C(34)-H(34C) | 0.9800     | C(52)-H(52B) | 0.9800     |
| C(35)-C(40)  | 1.3951(17) | C(52)-H(52C) | 0.9800     |
| C(35)-C(36)  | 1.4037(17) | C(53)-H(53A) | 0.9800     |
| C(36)-C(37)  | 1.4012(18) | C(53)-H(53B) | 0.9800     |
| C(36)-C(47)  | 1.5412(18) | C(53)-H(53C) | 0.9800     |
| C(37)-C(38)  | 1.3968(18) | C(54)-H(54A) | 0.9800     |
| C(37)-H(37)  | 0.9500     | C(54)-H(54B) | 0.9800     |
| C(38)-C(39)  | 1.3988(17) | C(54)-H(54C) | 0.9800     |
| C(38)-C(51)  | 1.5333(18) | C(55)-C(57)  | 1.538(2)   |
| C(39)-C(40)  | 1.3962(17) | C(55)-C(58)  | 1.5404(19) |
| C(39)-H(39)  | 0.9500     | C(55)-C(56)  | 1.544(2)   |
| C(40)-C(41)  | 1.4935(17) | C(56)-H(56A) | 0.9800     |
| C(41)-C(42)  | 1.3932(17) | C(56)-H(56B) | 0.9800     |
| C(41)-C(46)  | 1.4023(17) | C(56)-H(56C) | 0.9800     |
| C(42)-C(43)  | 1.4078(17) | C(57)-H(57A) | 0.9800     |
| C(43)-C(44)  | 1.3935(18) | C(57)-H(57B) | 0.9800     |

|              |            |                   |             |
|--------------|------------|-------------------|-------------|
| C(57)-H(57C) | 0.9800     | C(1)-Rh(1)-P(1)   | 77.68(4)    |
| C(58)-H(58A) | 0.9800     | C(1)-Rh(1)-P(2)   | 77.87(4)    |
| C(58)-H(58B) | 0.9800     | P(1)-Rh(1)-P(2)   | 155.490(13) |
| C(58)-H(58C) | 0.9800     | C(1)-Rh(1)-C(64)  | 160.39(5)   |
| C(59)-C(62)  | 1.5319(19) | P(1)-Rh(1)-C(64)  | 83.21(4)    |
| C(59)-C(61)  | 1.535(2)   | P(2)-Rh(1)-C(64)  | 121.30(4)   |
| C(59)-C(60)  | 1.540(2)   | C(1)-Rh(1)-C(63)  | 163.41(5)   |
| C(60)-H(60A) | 0.9800     | P(1)-Rh(1)-C(63)  | 118.91(4)   |
| C(60)-H(60B) | 0.9800     | P(2)-Rh(1)-C(63)  | 85.54(4)    |
| C(60)-H(60C) | 0.9800     | C(64)-Rh(1)-C(63) | 36.01(5)    |
| C(61)-H(61A) | 0.9800     | O(2)-P(1)-O(1)    | 105.75(5)   |
| C(61)-H(61B) | 0.9800     | O(2)-P(1)-O(3)    | 103.74(5)   |
| C(61)-H(61C) | 0.9800     | O(1)-P(1)-O(3)    | 95.53(5)    |
| C(62)-H(62A) | 0.9800     | O(2)-P(1)-Rh(1)   | 114.13(4)   |
| C(62)-H(62B) | 0.9800     | O(1)-P(1)-Rh(1)   | 110.47(4)   |
| C(62)-H(62C) | 0.9800     | O(3)-P(1)-Rh(1)   | 124.51(4)   |
| C(63)-C(64)  | 1.377(2)   | O(6)-P(2)-O(4)    | 105.11(5)   |
| C(63)-H(63A) | 0.926(14)  | O(6)-P(2)-O(5)    | 103.56(5)   |
| C(63)-H(63B) | 0.947(15)  | O(4)-P(2)-O(5)    | 95.35(5)    |
| C(64)-H(64A) | 0.953(14)  | O(6)-P(2)-Rh(1)   | 113.70(4)   |
| C(64)-H(64B) | 0.964(14)  | O(4)-P(2)-Rh(1)   | 110.00(4)   |
| C(65)-C(66)  | 1.550(11)  | O(5)-P(2)-Rh(1)   | 126.12(4)   |
| C(65)-H(65A) | 0.9800     | C(2)-O(1)-P(1)    | 111.77(8)   |
| C(65)-H(65B) | 0.9800     | C(7)-O(2)-P(1)    | 123.72(8)   |
| C(65)-H(65C) | 0.9800     | C(14)-O(3)-P(1)   | 120.55(8)   |
| C(66)-C(67)  | 1.506(10)  | C(6)-O(4)-P(2)    | 111.77(8)   |
| C(66)-H(66A) | 0.9900     | C(35)-O(5)-P(2)   | 115.25(8)   |
| C(66)-H(66B) | 0.9900     | C(42)-O(6)-P(2)   | 131.16(8)   |
| C(67)-C(68)  | 1.505(11)  | C(2)-C(1)-C(6)    | 115.07(11)  |
| C(67)-H(67A) | 0.9900     | C(2)-C(1)-Rh(1)   | 122.46(9)   |
| C(67)-H(67B) | 0.9900     | C(6)-C(1)-Rh(1)   | 122.43(9)   |
| C(68)-C(69)  | 1.423(12)  | C(3)-C(2)-C(1)    | 124.05(12)  |
| C(68)-H(68A) | 0.9900     | C(3)-C(2)-O(1)    | 118.61(12)  |
| C(68)-H(68B) | 0.9900     | C(1)-C(2)-O(1)    | 117.34(11)  |
| C(69)-H(69A) | 0.9800     | C(2)-C(3)-C(4)    | 117.72(13)  |
| C(69)-H(69B) | 0.9800     | C(2)-C(3)-H(3)    | 121.1       |
| C(69)-H(69C) | 0.9800     | C(4)-C(3)-H(3)    | 121.2       |
|              |            | C(5)-C(4)-C(3)    | 121.08(12)  |

|                   |            |                     |            |
|-------------------|------------|---------------------|------------|
| C(5)-C(4)-H(4)    | 119.5      | C(18)-C(17)-C(16)   | 117.52(13) |
| C(3)-C(4)-H(4)    | 119.4      | C(18)-C(17)-C(31)   | 120.34(13) |
| C(6)-C(5)-C(4)    | 118.28(12) | C(16)-C(17)-C(31)   | 122.11(13) |
| C(6)-C(5)-H(5)    | 120.9      | C(17)-C(18)-C(13)   | 121.51(13) |
| C(4)-C(5)-H(5)    | 120.9      | C(17)-C(18)-H(18)   | 119.3      |
| C(5)-C(6)-C(1)    | 123.77(12) | C(13)-C(18)-H(18)   | 119.2      |
| C(5)-C(6)-O(4)    | 118.76(11) | C(8)-C(19)-C(22)    | 111.26(11) |
| C(1)-C(6)-O(4)    | 117.46(11) | C(8)-C(19)-C(21)    | 111.81(10) |
| C(12)-C(7)-C(8)   | 123.16(12) | C(22)-C(19)-C(21)   | 107.84(11) |
| C(12)-C(7)-O(2)   | 117.28(11) | C(8)-C(19)-C(20)    | 109.61(11) |
| C(8)-C(7)-O(2)    | 119.32(11) | C(22)-C(19)-C(20)   | 107.22(11) |
| C(9)-C(8)-C(7)    | 115.46(12) | C(21)-C(19)-C(20)   | 108.96(11) |
| C(9)-C(8)-C(19)   | 122.03(11) | C(19)-C(20)-H(20A)  | 109.5      |
| C(7)-C(8)-C(19)   | 122.38(11) | C(19)-C(20)-H(20B)  | 109.4      |
| C(8)-C(9)-C(10)   | 123.55(12) | H(20A)-C(20)-H(20B) | 109.5      |
| C(8)-C(9)-H(9)    | 118.2      | C(19)-C(20)-H(20C)  | 109.5      |
| C(10)-C(9)-H(9)   | 118.2      | H(20A)-C(20)-H(20C) | 109.5      |
| C(11)-C(10)-C(9)  | 117.86(12) | H(20B)-C(20)-H(20C) | 109.5      |
| C(11)-C(10)-C(23) | 122.28(12) | C(19)-C(21)-H(21A)  | 109.4      |
| C(9)-C(10)-C(23)  | 119.86(12) | C(19)-C(21)-H(21B)  | 109.5      |
| C(10)-C(11)-C(12) | 121.13(13) | H(21A)-C(21)-H(21B) | 109.5      |
| C(10)-C(11)-H(11) | 119.4      | C(19)-C(21)-H(21C)  | 109.5      |
| C(12)-C(11)-H(11) | 119.4      | H(21A)-C(21)-H(21C) | 109.5      |
| C(7)-C(12)-C(11)  | 118.26(12) | H(21B)-C(21)-H(21C) | 109.5      |
| C(7)-C(12)-C(13)  | 122.13(12) | C(19)-C(22)-H(22A)  | 109.5      |
| C(11)-C(12)-C(13) | 119.47(12) | C(19)-C(22)-H(22B)  | 109.5      |
| C(18)-C(13)-C(14) | 118.50(12) | H(22A)-C(22)-H(22B) | 109.5      |
| C(18)-C(13)-C(12) | 118.61(12) | C(19)-C(22)-H(22C)  | 109.4      |
| C(14)-C(13)-C(12) | 122.89(12) | H(22A)-C(22)-H(22C) | 109.5      |
| C(13)-C(14)-O(3)  | 116.81(11) | H(22B)-C(22)-H(22C) | 109.5      |
| C(13)-C(14)-C(15) | 122.45(12) | C(25)-C(23)-C(10)   | 112.08(12) |
| O(3)-C(14)-C(15)  | 120.55(12) | C(25)-C(23)-C(26)   | 108.44(14) |
| C(16)-C(15)-C(14) | 115.72(12) | C(10)-C(23)-C(26)   | 108.67(12) |
| C(16)-C(15)-C(27) | 120.44(12) | C(25)-C(23)-C(24)   | 108.29(14) |
| C(14)-C(15)-C(27) | 123.75(12) | C(10)-C(23)-C(24)   | 109.95(12) |
| C(17)-C(16)-C(15) | 123.93(13) | C(26)-C(23)-C(24)   | 109.36(12) |
| C(17)-C(16)-H(16) | 118.0      | C(23)-C(24)-H(24A)  | 109.5      |
| C(15)-C(16)-H(16) | 118.0      | C(23)-C(24)-H(24B)  | 109.5      |

|                     |            |                     |            |
|---------------------|------------|---------------------|------------|
| H(24A)-C(24)-H(24B) | 109.5      | H(30A)-C(30)-H(30C) | 109.5      |
| C(23)-C(24)-H(24C)  | 109.4      | H(30B)-C(30)-H(30C) | 109.5      |
| H(24A)-C(24)-H(24C) | 109.5      | C(17)-C(31)-C(34)   | 111.75(13) |
| H(24B)-C(24)-H(24C) | 109.5      | C(17)-C(31)-C(33)   | 109.17(13) |
| C(23)-C(25)-H(25A)  | 109.4      | C(34)-C(31)-C(33)   | 108.92(13) |
| C(23)-C(25)-H(25B)  | 109.5      | C(17)-C(31)-C(32)   | 110.36(12) |
| H(25A)-C(25)-H(25B) | 109.5      | C(34)-C(31)-C(32)   | 107.28(15) |
| C(23)-C(25)-H(25C)  | 109.5      | C(33)-C(31)-C(32)   | 109.32(15) |
| H(25A)-C(25)-H(25C) | 109.5      | C(31)-C(32)-H(32A)  | 109.5      |
| H(25B)-C(25)-H(25C) | 109.5      | C(31)-C(32)-H(32B)  | 109.5      |
| C(23)-C(26)-H(26A)  | 109.4      | H(32A)-C(32)-H(32B) | 109.5      |
| C(23)-C(26)-H(26B)  | 109.5      | C(31)-C(32)-H(32C)  | 109.5      |
| H(26A)-C(26)-H(26B) | 109.5      | H(32A)-C(32)-H(32C) | 109.5      |
| C(23)-C(26)-H(26C)  | 109.5      | H(32B)-C(32)-H(32C) | 109.5      |
| H(26A)-C(26)-H(26C) | 109.5      | C(31)-C(33)-H(33A)  | 109.4      |
| H(26B)-C(26)-H(26C) | 109.5      | C(31)-C(33)-H(33B)  | 109.5      |
| C(30)-C(27)-C(29)   | 107.52(14) | H(33A)-C(33)-H(33B) | 109.5      |
| C(30)-C(27)-C(15)   | 112.29(12) | C(31)-C(33)-H(33C)  | 109.5      |
| C(29)-C(27)-C(15)   | 111.69(13) | H(33A)-C(33)-H(33C) | 109.5      |
| C(30)-C(27)-C(28)   | 109.35(14) | H(33B)-C(33)-H(33C) | 109.5      |
| C(29)-C(27)-C(28)   | 106.66(13) | C(31)-C(34)-H(34A)  | 109.6      |
| C(15)-C(27)-C(28)   | 109.15(13) | C(31)-C(34)-H(34B)  | 109.4      |
| C(27)-C(28)-H(28A)  | 109.4      | H(34A)-C(34)-H(34B) | 109.5      |
| C(27)-C(28)-H(28B)  | 109.5      | C(31)-C(34)-H(34C)  | 109.4      |
| H(28A)-C(28)-H(28B) | 109.5      | H(34A)-C(34)-H(34C) | 109.5      |
| C(27)-C(28)-H(28C)  | 109.4      | H(34B)-C(34)-H(34C) | 109.5      |
| H(28A)-C(28)-H(28C) | 109.5      | C(40)-C(35)-O(5)    | 117.16(11) |
| H(28B)-C(28)-H(28C) | 109.5      | C(40)-C(35)-C(36)   | 122.74(11) |
| C(27)-C(29)-H(29A)  | 109.4      | O(5)-C(35)-C(36)    | 120.10(11) |
| C(27)-C(29)-H(29B)  | 109.5      | C(37)-C(36)-C(35)   | 115.90(11) |
| H(29A)-C(29)-H(29B) | 109.5      | C(37)-C(36)-C(47)   | 121.68(11) |
| C(27)-C(29)-H(29C)  | 109.5      | C(35)-C(36)-C(47)   | 122.41(11) |
| H(29A)-C(29)-H(29C) | 109.5      | C(38)-C(37)-C(36)   | 123.40(11) |
| H(29B)-C(29)-H(29C) | 109.5      | C(38)-C(37)-H(37)   | 118.3      |
| C(27)-C(30)-H(30A)  | 109.4      | C(36)-C(37)-H(37)   | 118.3      |
| C(27)-C(30)-H(30B)  | 109.6      | C(37)-C(38)-C(39)   | 117.47(12) |
| H(30A)-C(30)-H(30B) | 109.5      | C(37)-C(38)-C(51)   | 122.99(11) |
| C(27)-C(30)-H(30C)  | 109.5      | C(39)-C(38)-C(51)   | 119.52(11) |

|                     |            |                     |            |
|---------------------|------------|---------------------|------------|
| C(40)-C(39)-C(38)   | 121.61(12) | H(49A)-C(49)-H(49B) | 109.5      |
| C(40)-C(39)-H(39)   | 119.2      | C(47)-C(49)-H(49C)  | 109.5      |
| C(38)-C(39)-H(39)   | 119.2      | H(49A)-C(49)-H(49C) | 109.5      |
| C(35)-C(40)-C(39)   | 118.01(11) | H(49B)-C(49)-H(49C) | 109.5      |
| C(35)-C(40)-C(41)   | 122.73(11) | C(47)-C(50)-H(50A)  | 109.4      |
| C(39)-C(40)-C(41)   | 119.21(11) | C(47)-C(50)-H(50B)  | 109.5      |
| C(42)-C(41)-C(46)   | 118.14(11) | H(50A)-C(50)-H(50B) | 109.5      |
| C(42)-C(41)-C(40)   | 124.14(11) | C(47)-C(50)-H(50C)  | 109.5      |
| C(46)-C(41)-C(40)   | 117.66(11) | H(50A)-C(50)-H(50C) | 109.5      |
| C(41)-C(42)-O(6)    | 119.78(11) | H(50B)-C(50)-H(50C) | 109.5      |
| C(41)-C(42)-C(43)   | 122.49(11) | C(52)-C(51)-C(38)   | 112.64(11) |
| O(6)-C(42)-C(43)    | 117.35(11) | C(52)-C(51)-C(54)   | 108.58(12) |
| C(44)-C(43)-C(42)   | 116.18(11) | C(38)-C(51)-C(54)   | 110.02(11) |
| C(44)-C(43)-C(55)   | 121.06(11) | C(52)-C(51)-C(53)   | 107.94(12) |
| C(42)-C(43)-C(55)   | 122.74(11) | C(38)-C(51)-C(53)   | 108.41(11) |
| C(43)-C(44)-C(45)   | 123.57(12) | C(54)-C(51)-C(53)   | 109.19(12) |
| C(43)-C(44)-H(44)   | 118.2      | C(51)-C(52)-H(52A)  | 109.4      |
| C(45)-C(44)-H(44)   | 118.2      | C(51)-C(52)-H(52B)  | 109.5      |
| C(46)-C(45)-C(44)   | 117.54(12) | H(52A)-C(52)-H(52B) | 109.5      |
| C(46)-C(45)-C(59)   | 123.00(11) | C(51)-C(52)-H(52C)  | 109.5      |
| C(44)-C(45)-C(59)   | 119.46(11) | H(52A)-C(52)-H(52C) | 109.5      |
| C(45)-C(46)-C(41)   | 121.74(12) | H(52B)-C(52)-H(52C) | 109.5      |
| C(45)-C(46)-H(46)   | 119.1      | C(51)-C(53)-H(53A)  | 109.5      |
| C(41)-C(46)-H(46)   | 119.2      | C(51)-C(53)-H(53B)  | 109.5      |
| C(49)-C(47)-C(48)   | 107.24(12) | H(53A)-C(53)-H(53B) | 109.5      |
| C(49)-C(47)-C(50)   | 110.28(12) | C(51)-C(53)-H(53C)  | 109.5      |
| C(48)-C(47)-C(50)   | 106.95(12) | H(53A)-C(53)-H(53C) | 109.5      |
| C(49)-C(47)-C(36)   | 111.35(11) | H(53B)-C(53)-H(53C) | 109.5      |
| C(48)-C(47)-C(36)   | 111.02(11) | C(51)-C(54)-H(54A)  | 109.5      |
| C(50)-C(47)-C(36)   | 109.88(11) | C(51)-C(54)-H(54B)  | 109.5      |
| C(47)-C(48)-H(48A)  | 109.5      | H(54A)-C(54)-H(54B) | 109.5      |
| C(47)-C(48)-H(48B)  | 109.6      | C(51)-C(54)-H(54C)  | 109.4      |
| H(48A)-C(48)-H(48B) | 109.5      | H(54A)-C(54)-H(54C) | 109.5      |
| C(47)-C(48)-H(48C)  | 109.4      | H(54B)-C(54)-H(54C) | 109.5      |
| H(48A)-C(48)-H(48C) | 109.5      | C(57)-C(55)-C(43)   | 110.20(11) |
| H(48B)-C(48)-H(48C) | 109.5      | C(57)-C(55)-C(58)   | 108.35(11) |
| C(47)-C(49)-H(49A)  | 109.4      | C(43)-C(55)-C(58)   | 110.74(11) |
| C(47)-C(49)-H(49B)  | 109.5      | C(57)-C(55)-C(56)   | 110.40(12) |

|                     |            |                     |           |
|---------------------|------------|---------------------|-----------|
| C(43)-C(55)-C(56)   | 110.97(11) | C(59)-C(62)-H(62A)  | 109.5     |
| C(58)-C(55)-C(56)   | 106.06(12) | C(59)-C(62)-H(62B)  | 109.5     |
| C(55)-C(56)-H(56A)  | 109.6      | H(62A)-C(62)-H(62B) | 109.5     |
| C(55)-C(56)-H(56B)  | 109.4      | C(59)-C(62)-H(62C)  | 109.5     |
| H(56A)-C(56)-H(56B) | 109.5      | H(62A)-C(62)-H(62C) | 109.5     |
| C(55)-C(56)-H(56C)  | 109.4      | H(62B)-C(62)-H(62C) | 109.5     |
| H(56A)-C(56)-H(56C) | 109.5      | C(64)-C(63)-Rh(1)   | 71.32(8)  |
| H(56B)-C(56)-H(56C) | 109.5      | C(64)-C(63)-H(63A)  | 122.3(12) |
| C(55)-C(57)-H(57A)  | 109.4      | Rh(1)-C(63)-H(63A)  | 107.9(12) |
| C(55)-C(57)-H(57B)  | 109.4      | C(64)-C(63)-H(63B)  | 120.4(12) |
| H(57A)-C(57)-H(57B) | 109.5      | Rh(1)-C(63)-H(63B)  | 108.0(12) |
| C(55)-C(57)-H(57C)  | 109.6      | H(63A)-C(63)-H(63B) | 114.4(17) |
| H(57A)-C(57)-H(57C) | 109.5      | C(63)-C(64)-Rh(1)   | 72.66(8)  |
| H(57B)-C(57)-H(57C) | 109.5      | C(63)-C(64)-H(64A)  | 120.1(12) |
| C(55)-C(58)-H(58A)  | 109.5      | Rh(1)-C(64)-H(64A)  | 107.5(12) |
| C(55)-C(58)-H(58B)  | 109.5      | C(63)-C(64)-H(64B)  | 120.3(12) |
| H(58A)-C(58)-H(58B) | 109.5      | Rh(1)-C(64)-H(64B)  | 109.2(11) |
| C(55)-C(58)-H(58C)  | 109.4      | H(64A)-C(64)-H(64B) | 115.7(16) |
| H(58A)-C(58)-H(58C) | 109.5      | C(66)-C(65)-H(65A)  | 109.5     |
| H(58B)-C(58)-H(58C) | 109.5      | C(66)-C(65)-H(65B)  | 109.4     |
| C(62)-C(59)-C(45)   | 111.88(11) | H(65A)-C(65)-H(65B) | 109.5     |
| C(62)-C(59)-C(61)   | 108.41(12) | C(66)-C(65)-H(65C)  | 109.5     |
| C(45)-C(59)-C(61)   | 108.28(11) | H(65A)-C(65)-H(65C) | 109.5     |
| C(62)-C(59)-C(60)   | 108.34(12) | H(65B)-C(65)-H(65C) | 109.5     |
| C(45)-C(59)-C(60)   | 111.03(11) | C(67)-C(66)-C(65)   | 112.8(5)  |
| C(61)-C(59)-C(60)   | 108.82(12) | C(67)-C(66)-H(66A)  | 109.0     |
| C(59)-C(60)-H(60A)  | 109.5      | C(65)-C(66)-H(66A)  | 109.0     |
| C(59)-C(60)-H(60B)  | 109.5      | C(67)-C(66)-H(66B)  | 109.0     |
| H(60A)-C(60)-H(60B) | 109.5      | C(65)-C(66)-H(66B)  | 109.1     |
| C(59)-C(60)-H(60C)  | 109.4      | H(66A)-C(66)-H(66B) | 107.8     |
| H(60A)-C(60)-H(60C) | 109.5      | C(68)-C(67)-C(66)   | 122.1(6)  |
| H(60B)-C(60)-H(60C) | 109.5      | C(68)-C(67)-H(67A)  | 106.8     |
| C(59)-C(61)-H(61A)  | 109.4      | C(66)-C(67)-H(67A)  | 106.8     |
| C(59)-C(61)-H(61B)  | 109.5      | C(68)-C(67)-H(67B)  | 106.8     |
| H(61A)-C(61)-H(61B) | 109.5      | C(66)-C(67)-H(67B)  | 106.8     |
| C(59)-C(61)-H(61C)  | 109.5      | H(67A)-C(67)-H(67B) | 106.6     |
| H(61A)-C(61)-H(61C) | 109.5      | C(69)-C(68)-C(67)   | 120.1(7)  |
| H(61B)-C(61)-H(61C) | 109.5      | C(69)-C(68)-H(68A)  | 107.3     |

|                     |       |                     |       |
|---------------------|-------|---------------------|-------|
| C(67)-C(68)-H(68A)  | 107.3 | C(68)-C(69)-H(69B)  | 109.4 |
| C(69)-C(68)-H(68B)  | 107.3 | H(69A)-C(69)-H(69B) | 109.5 |
| C(67)-C(68)-H(68B)  | 107.3 | C(68)-C(69)-H(69C)  | 109.5 |
| H(68A)-C(68)-H(68B) | 106.9 | H(69A)-C(69)-H(69C) | 109.5 |
| C(68)-C(69)-H(69A)  | 109.5 | H(69B)-C(69)-H(69C) | 109.5 |

**Figure S9.** ORTEP view (30% ellipsoids) of **5b**. H atoms (except for ethylene) have been omitted for clarity.

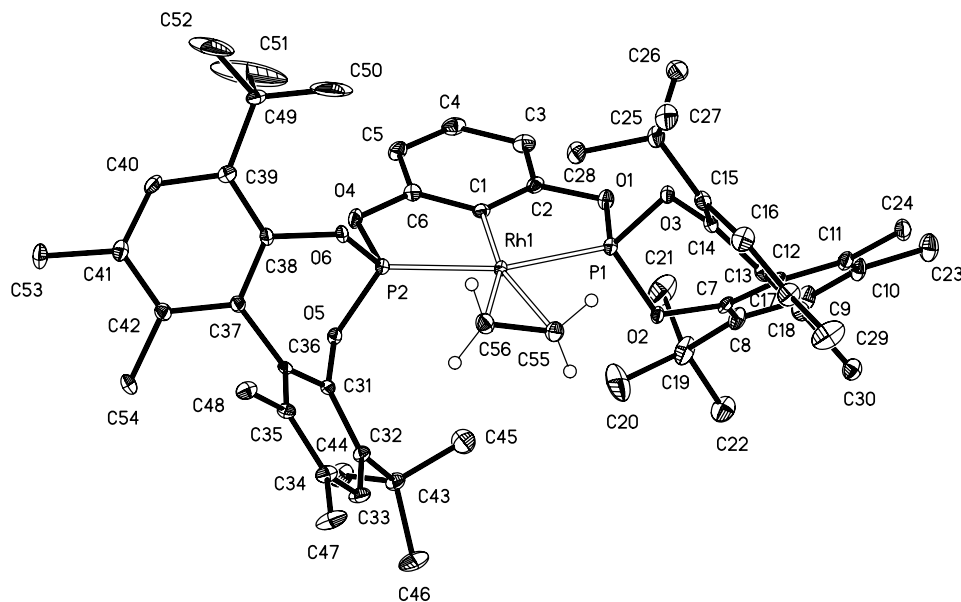



**Table S6.** Crystal data and structure refinement for **5b**.

|                                   |                                                                                                     |
|-----------------------------------|-----------------------------------------------------------------------------------------------------|
| Empirical formula                 | C <sub>56</sub> H <sub>71</sub> O <sub>6</sub> P <sub>2</sub> Rh                                    |
| Formula weight                    | 1004.98                                                                                             |
| Temperature                       | 100(2) K                                                                                            |
| Wavelength                        | 0.71073 Å                                                                                           |
| Crystal system                    | Orthorhombic                                                                                        |
| Space group                       | P2 <sub>1</sub> 2 <sub>1</sub> 2 <sub>1</sub>                                                       |
| Unit cell dimensions              | a = 10.4092(11) Å      α = 90°.<br>b = 18.8544(18) Å      β = 90°.<br>c = 26.636(3) Å      γ = 90°. |
| Volume                            | 5227.6(9) Å <sup>3</sup>                                                                            |
| Z                                 | 4                                                                                                   |
| Density (calculated)              | 1.277 Mg/m <sup>3</sup>                                                                             |
| Absorption coefficient            | 0.436 mm <sup>-1</sup>                                                                              |
| F(000)                            | 2120                                                                                                |
| Crystal size                      | 0.36 x 0.16 x 0.13 mm <sup>3</sup>                                                                  |
| Theta range for data collection   | 2.92 to 27.00°.                                                                                     |
| Index ranges                      | -13 ≤ h ≤ 13, -16 ≤ k ≤ 24, -33 ≤ l ≤ 34                                                            |
| Reflections collected             | 45841                                                                                               |
| Independent reflections           | 11402 [R(int) = 0.0496]                                                                             |
| Completeness to theta = 27.00°    | 99.7 %                                                                                              |
| Absorption correction             | Semi-empirical from equivalents                                                                     |
| Max. and min. transmission        | 0.9455 and 0.8589                                                                                   |
| Refinement method                 | Full-matrix least-squares on F <sup>2</sup>                                                         |
| Data / restraints / parameters    | 11402 / 10 / 602                                                                                    |
| Goodness-of-fit on F <sup>2</sup> | 1.019                                                                                               |
| Final R indices [I > 2σ(I)]       | R1 = 0.0352, wR2 = 0.0717                                                                           |
| R indices (all data)              | R1 = 0.0421, wR2 = 0.0747                                                                           |
| Absolute structure parameter      | -0.018(17)                                                                                          |
| Largest diff. peak and hole       | 0.884 and -0.718 e.Å <sup>-3</sup>                                                                  |

**Table S7.** Bond lengths [Å] and angles [°] for **5b**.

|             |            |              |          |
|-------------|------------|--------------|----------|
| Rh(1)-C(1)  | 2.019(3)   | C(12)-C(13)  | 1.494(4) |
| Rh(1)-P(2)  | 2.2096(7)  | C(13)-C(14)  | 1.388(4) |
| Rh(1)-P(1)  | 2.2237(7)  | C(13)-C(18)  | 1.401(4) |
| Rh(1)-C(55) | 2.228(3)   | C(14)-C(15)  | 1.392(4) |
| Rh(1)-C(56) | 2.230(3)   | C(15)-C(16)  | 1.392(4) |
| P(1)-O(2)   | 1.6030(19) | C(15)-C(25)  | 1.534(4) |
| P(1)-O(1)   | 1.614(2)   | C(16)-C(17)  | 1.384(5) |
| P(1)-O(3)   | 1.614(2)   | C(16)-H(16)  | 0.9500   |
| P(2)-O(6)   | 1.594(2)   | C(17)-C(18)  | 1.391(4) |
| P(2)-O(4)   | 1.613(2)   | C(17)-C(29)  | 1.508(4) |
| P(2)-O(5)   | 1.622(2)   | C(18)-C(30)  | 1.503(4) |
| O(1)-C(2)   | 1.397(3)   | C(19)-C(20)  | 1.503(5) |
| O(2)-C(7)   | 1.414(3)   | C(19)-C(22)  | 1.533(4) |
| O(3)-C(14)  | 1.410(3)   | C(19)-C(21)  | 1.547(5) |
| O(4)-C(6)   | 1.403(3)   | C(20)-H(20A) | 0.9800   |
| O(5)-C(31)  | 1.401(3)   | C(20)-H(20B) | 0.9800   |
| O(6)-C(38)  | 1.414(3)   | C(20)-H(20C) | 0.9800   |
| C(1)-C(2)   | 1.380(4)   | C(21)-H(21A) | 0.9800   |
| C(1)-C(6)   | 1.393(4)   | C(21)-H(21B) | 0.9800   |
| C(2)-C(3)   | 1.386(4)   | C(21)-H(21C) | 0.9800   |
| C(3)-C(4)   | 1.391(4)   | C(22)-H(22A) | 0.9800   |
| C(3)-H(3)   | 0.9500     | C(22)-H(22B) | 0.9800   |
| C(4)-C(5)   | 1.372(4)   | C(22)-H(22C) | 0.9800   |
| C(4)-H(4)   | 0.9500     | C(23)-H(23A) | 0.9800   |
| C(5)-C(6)   | 1.378(4)   | C(23)-H(23B) | 0.9800   |
| C(5)-H(5)   | 0.9500     | C(23)-H(23C) | 0.9800   |
| C(7)-C(8)   | 1.385(4)   | C(24)-H(24A) | 0.9800   |
| C(7)-C(12)  | 1.394(4)   | C(24)-H(24B) | 0.9800   |
| C(8)-C(9)   | 1.409(4)   | C(24)-H(24C) | 0.9800   |
| C(8)-C(19)  | 1.532(4)   | C(25)-C(26)  | 1.527(4) |
| C(9)-C(10)  | 1.376(4)   | C(25)-C(28)  | 1.531(4) |
| C(9)-H(9)   | 0.9500     | C(25)-C(27)  | 1.540(4) |
| C(10)-C(11) | 1.398(4)   | C(26)-H(26A) | 0.9800   |
| C(10)-C(23) | 1.509(4)   | C(26)-H(26B) | 0.9800   |
| C(11)-C(12) | 1.399(4)   | C(26)-H(26C) | 0.9800   |
| C(11)-C(24) | 1.502(4)   | C(27)-H(27A) | 0.9800   |

|              |          |                 |           |
|--------------|----------|-----------------|-----------|
| C(27)-H(27B) | 0.9800   | C(45)-H(45A)    | 0.9800    |
| C(27)-H(27C) | 0.9800   | C(45)-H(45B)    | 0.9800    |
| C(28)-H(28A) | 0.9800   | C(45)-H(45C)    | 0.9800    |
| C(28)-H(28B) | 0.9800   | C(46)-H(46A)    | 0.9800    |
| C(28)-H(28C) | 0.9800   | C(46)-H(46B)    | 0.9800    |
| C(29)-H(29A) | 0.9800   | C(46)-H(46C)    | 0.9800    |
| C(29)-H(29B) | 0.9800   | C(47)-H(47A)    | 0.9800    |
| C(29)-H(29C) | 0.9800   | C(47)-H(47B)    | 0.9800    |
| C(30)-H(30A) | 0.9800   | C(47)-H(47C)    | 0.9800    |
| C(30)-H(30B) | 0.9800   | C(48)-H(48A)    | 0.9800    |
| C(30)-H(30C) | 0.9800   | C(48)-H(48B)    | 0.9800    |
| C(31)-C(36)  | 1.396(4) | C(48)-H(48C)    | 0.9800    |
| C(31)-C(32)  | 1.403(4) | C(49)-C(50)     | 1.464(6)  |
| C(32)-C(33)  | 1.389(4) | C(49)-C(52)     | 1.470(5)  |
| C(32)-C(43)  | 1.540(4) | C(49)-C(51)     | 1.525(7)  |
| C(33)-C(34)  | 1.386(4) | C(50)-H(50A)    | 0.9800    |
| C(33)-H(33)  | 0.9500   | C(50)-H(50B)    | 0.9800    |
| C(34)-C(35)  | 1.400(4) | C(50)-H(50C)    | 0.9800    |
| C(34)-C(47)  | 1.506(4) | C(51)-H(51A)    | 0.9800    |
| C(35)-C(36)  | 1.402(4) | C(51)-H(51B)    | 0.9800    |
| C(35)-C(48)  | 1.505(4) | C(51)-H(51C)    | 0.9800    |
| C(36)-C(37)  | 1.488(4) | C(52)-H(52A)    | 0.9800    |
| C(37)-C(38)  | 1.387(4) | C(52)-H(52B)    | 0.9800    |
| C(37)-C(42)  | 1.404(4) | C(52)-H(52C)    | 0.9800    |
| C(38)-C(39)  | 1.384(4) | C(53)-H(53A)    | 0.9800    |
| C(39)-C(40)  | 1.398(4) | C(53)-H(53B)    | 0.9800    |
| C(39)-C(49)  | 1.539(4) | C(53)-H(53C)    | 0.9800    |
| C(40)-C(41)  | 1.383(4) | C(54)-H(54A)    | 0.9800    |
| C(40)-H(40)  | 0.9500   | C(54)-H(54B)    | 0.9800    |
| C(41)-C(42)  | 1.400(4) | C(54)-H(54C)    | 0.9800    |
| C(41)-C(53)  | 1.505(4) | C(55)-C(56)     | 1.353(4)  |
| C(42)-C(54)  | 1.502(4) | C(55)-H(55A)    | 0.966(18) |
| C(43)-C(45)  | 1.519(4) | C(55)-H(55B)    | 0.942(18) |
| C(43)-C(46)  | 1.534(4) | C(56)-H(56A)    | 0.957(19) |
| C(43)-C(44)  | 1.536(5) | C(56)-H(56B)    | 0.939(18) |
| C(44)-H(44A) | 0.9800   |                 |           |
| C(44)-H(44B) | 0.9800   | C(1)-Rh(1)-P(2) | 77.86(8)  |
| C(44)-H(44C) | 0.9800   | C(1)-Rh(1)-P(1) | 77.57(8)  |

|                   |            |                   |          |
|-------------------|------------|-------------------|----------|
| P(2)-Rh(1)-P(1)   | 155.37(3)  | C(4)-C(5)-C(6)    | 118.5(3) |
| C(1)-Rh(1)-C(55)  | 163.13(11) | C(4)-C(5)-H(5)    | 120.7    |
| P(2)-Rh(1)-C(55)  | 118.68(8)  | C(6)-C(5)-H(5)    | 120.8    |
| P(1)-Rh(1)-C(55)  | 85.76(8)   | C(5)-C(6)-C(1)    | 124.0(3) |
| C(1)-Rh(1)-C(56)  | 161.50(11) | C(5)-C(6)-O(4)    | 118.8(3) |
| P(2)-Rh(1)-C(56)  | 84.39(8)   | C(1)-C(6)-O(4)    | 117.2(3) |
| P(1)-Rh(1)-C(56)  | 120.24(8)  | C(8)-C(7)-C(12)   | 124.1(2) |
| C(55)-Rh(1)-C(56) | 35.32(11)  | C(8)-C(7)-O(2)    | 120.7(2) |
| O(2)-P(1)-O(1)    | 104.53(10) | C(12)-C(7)-O(2)   | 115.2(2) |
| O(2)-P(1)-O(3)    | 103.44(10) | C(7)-C(8)-C(9)    | 113.9(3) |
| O(1)-P(1)-O(3)    | 95.29(10)  | C(7)-C(8)-C(19)   | 128.2(3) |
| O(2)-P(1)-Rh(1)   | 116.10(8)  | C(9)-C(8)-C(19)   | 117.9(3) |
| O(1)-P(1)-Rh(1)   | 109.60(7)  | C(10)-C(9)-C(8)   | 124.2(3) |
| O(3)-P(1)-Rh(1)   | 124.49(7)  | C(10)-C(9)-H(9)   | 117.9    |
| O(6)-P(2)-O(4)    | 104.45(11) | C(8)-C(9)-H(9)    | 117.9    |
| O(6)-P(2)-O(5)    | 103.38(11) | C(9)-C(10)-C(11)  | 119.7(3) |
| O(4)-P(2)-O(5)    | 95.60(11)  | C(9)-C(10)-C(23)  | 119.8(3) |
| O(6)-P(2)-Rh(1)   | 117.07(8)  | C(11)-C(10)-C(23) | 120.5(3) |
| O(4)-P(2)-Rh(1)   | 110.11(8)  | C(10)-C(11)-C(12) | 118.2(3) |
| O(5)-P(2)-Rh(1)   | 122.90(7)  | C(10)-C(11)-C(24) | 120.0(3) |
| C(2)-O(1)-P(1)    | 112.41(17) | C(12)-C(11)-C(24) | 121.8(3) |
| C(7)-O(2)-P(1)    | 119.31(17) | C(7)-C(12)-C(11)  | 119.5(2) |
| C(14)-O(3)-P(1)   | 118.37(18) | C(7)-C(12)-C(13)  | 119.9(2) |
| C(6)-O(4)-P(2)    | 112.21(17) | C(11)-C(12)-C(13) | 120.6(2) |
| C(31)-O(5)-P(2)   | 115.33(17) | C(14)-C(13)-C(18) | 119.3(3) |
| C(38)-O(6)-P(2)   | 122.50(18) | C(14)-C(13)-C(12) | 119.2(2) |
| C(2)-C(1)-C(6)    | 114.5(2)   | C(18)-C(13)-C(12) | 121.4(2) |
| C(2)-C(1)-Rh(1)   | 122.9(2)   | C(13)-C(14)-C(15) | 123.4(3) |
| C(6)-C(1)-Rh(1)   | 122.5(2)   | C(13)-C(14)-O(3)  | 116.3(2) |
| C(1)-C(2)-C(3)    | 124.5(3)   | C(15)-C(14)-O(3)  | 120.2(2) |
| C(1)-C(2)-O(1)    | 117.5(2)   | C(14)-C(15)-C(16) | 114.4(3) |
| C(3)-C(2)-O(1)    | 118.0(3)   | C(14)-C(15)-C(25) | 123.0(3) |
| C(2)-C(3)-C(4)    | 117.5(3)   | C(16)-C(15)-C(25) | 122.6(2) |
| C(2)-C(3)-H(3)    | 121.3      | C(17)-C(16)-C(15) | 123.9(3) |
| C(4)-C(3)-H(3)    | 121.3      | C(17)-C(16)-H(16) | 118.1    |
| C(5)-C(4)-C(3)    | 121.0(3)   | C(15)-C(16)-H(16) | 118.1    |
| C(5)-C(4)-H(4)    | 119.5      | C(16)-C(17)-C(18) | 119.7(3) |
| C(3)-C(4)-H(4)    | 119.5      | C(16)-C(17)-C(29) | 120.4(3) |

|                     |          |                     |          |
|---------------------|----------|---------------------|----------|
| C(18)-C(17)-C(29)   | 119.9(3) | H(24A)-C(24)-H(24C) | 109.5    |
| C(17)-C(18)-C(13)   | 118.3(3) | H(24B)-C(24)-H(24C) | 109.5    |
| C(17)-C(18)-C(30)   | 120.1(3) | C(26)-C(25)-C(28)   | 109.7(3) |
| C(13)-C(18)-C(30)   | 121.7(3) | C(26)-C(25)-C(15)   | 110.4(2) |
| C(20)-C(19)-C(8)    | 115.3(3) | C(28)-C(25)-C(15)   | 111.5(2) |
| C(20)-C(19)-C(22)   | 107.9(3) | C(26)-C(25)-C(27)   | 106.8(3) |
| C(8)-C(19)-C(22)    | 109.1(3) | C(28)-C(25)-C(27)   | 107.2(2) |
| C(20)-C(19)-C(21)   | 108.0(3) | C(15)-C(25)-C(27)   | 111.2(2) |
| C(8)-C(19)-C(21)    | 108.2(3) | C(25)-C(26)-H(26A)  | 109.5    |
| C(22)-C(19)-C(21)   | 108.3(3) | C(25)-C(26)-H(26B)  | 109.5    |
| C(19)-C(20)-H(20A)  | 109.4    | H(26A)-C(26)-H(26B) | 109.5    |
| C(19)-C(20)-H(20B)  | 109.4    | C(25)-C(26)-H(26C)  | 109.4    |
| H(20A)-C(20)-H(20B) | 109.5    | H(26A)-C(26)-H(26C) | 109.5    |
| C(19)-C(20)-H(20C)  | 109.6    | H(26B)-C(26)-H(26C) | 109.5    |
| H(20A)-C(20)-H(20C) | 109.5    | C(25)-C(27)-H(27A)  | 109.4    |
| H(20B)-C(20)-H(20C) | 109.5    | C(25)-C(27)-H(27B)  | 109.5    |
| C(19)-C(21)-H(21A)  | 109.4    | H(27A)-C(27)-H(27B) | 109.5    |
| C(19)-C(21)-H(21B)  | 109.4    | C(25)-C(27)-H(27C)  | 109.5    |
| H(21A)-C(21)-H(21B) | 109.5    | H(27A)-C(27)-H(27C) | 109.5    |
| C(19)-C(21)-H(21C)  | 109.6    | H(27B)-C(27)-H(27C) | 109.5    |
| H(21A)-C(21)-H(21C) | 109.5    | C(25)-C(28)-H(28A)  | 109.4    |
| H(21B)-C(21)-H(21C) | 109.5    | C(25)-C(28)-H(28B)  | 109.5    |
| C(19)-C(22)-H(22A)  | 109.6    | H(28A)-C(28)-H(28B) | 109.5    |
| C(19)-C(22)-H(22B)  | 109.3    | C(25)-C(28)-H(28C)  | 109.5    |
| H(22A)-C(22)-H(22B) | 109.5    | H(28A)-C(28)-H(28C) | 109.5    |
| C(19)-C(22)-H(22C)  | 109.5    | H(28B)-C(28)-H(28C) | 109.5    |
| H(22A)-C(22)-H(22C) | 109.5    | C(17)-C(29)-H(29A)  | 109.4    |
| H(22B)-C(22)-H(22C) | 109.5    | C(17)-C(29)-H(29B)  | 109.5    |
| C(10)-C(23)-H(23A)  | 109.5    | H(29A)-C(29)-H(29B) | 109.5    |
| C(10)-C(23)-H(23B)  | 109.5    | C(17)-C(29)-H(29C)  | 109.5    |
| H(23A)-C(23)-H(23B) | 109.5    | H(29A)-C(29)-H(29C) | 109.5    |
| C(10)-C(23)-H(23C)  | 109.5    | H(29B)-C(29)-H(29C) | 109.5    |
| H(23A)-C(23)-H(23C) | 109.5    | C(18)-C(30)-H(30A)  | 109.5    |
| H(23B)-C(23)-H(23C) | 109.5    | C(18)-C(30)-H(30B)  | 109.4    |
| C(11)-C(24)-H(24A)  | 109.5    | H(30A)-C(30)-H(30B) | 109.5    |
| C(11)-C(24)-H(24B)  | 109.4    | C(18)-C(30)-H(30C)  | 109.5    |
| H(24A)-C(24)-H(24B) | 109.5    | H(30A)-C(30)-H(30C) | 109.5    |
| C(11)-C(24)-H(24C)  | 109.5    | H(30B)-C(30)-H(30C) | 109.5    |

|                   |          |                     |          |
|-------------------|----------|---------------------|----------|
| C(36)-C(31)-O(5)  | 116.1(2) | C(46)-C(43)-C(44)   | 106.7(3) |
| C(36)-C(31)-C(32) | 123.3(3) | C(45)-C(43)-C(32)   | 112.1(3) |
| O(5)-C(31)-C(32)  | 120.6(2) | C(46)-C(43)-C(32)   | 110.3(3) |
| C(33)-C(32)-C(31) | 114.7(3) | C(44)-C(43)-C(32)   | 109.8(3) |
| C(33)-C(32)-C(43) | 122.2(3) | C(43)-C(44)-H(44A)  | 109.5    |
| C(31)-C(32)-C(43) | 123.0(3) | C(43)-C(44)-H(44B)  | 109.5    |
| C(34)-C(33)-C(32) | 124.0(3) | H(44A)-C(44)-H(44B) | 109.5    |
| C(34)-C(33)-H(33) | 118.0    | C(43)-C(44)-H(44C)  | 109.5    |
| C(32)-C(33)-H(33) | 118.0    | H(44A)-C(44)-H(44C) | 109.5    |
| C(33)-C(34)-C(35) | 119.1(3) | H(44B)-C(44)-H(44C) | 109.5    |
| C(33)-C(34)-C(47) | 120.3(3) | C(43)-C(45)-H(45A)  | 109.5    |
| C(35)-C(34)-C(47) | 120.6(3) | C(43)-C(45)-H(45B)  | 109.5    |
| C(34)-C(35)-C(36) | 119.2(3) | H(45A)-C(45)-H(45B) | 109.5    |
| C(34)-C(35)-C(48) | 118.9(3) | C(43)-C(45)-H(45C)  | 109.5    |
| C(36)-C(35)-C(48) | 121.9(3) | H(45A)-C(45)-H(45C) | 109.5    |
| C(31)-C(36)-C(35) | 118.6(2) | H(45B)-C(45)-H(45C) | 109.5    |
| C(31)-C(36)-C(37) | 119.2(2) | C(43)-C(46)-H(46A)  | 109.5    |
| C(35)-C(36)-C(37) | 122.1(2) | C(43)-C(46)-H(46B)  | 109.5    |
| C(38)-C(37)-C(42) | 119.3(3) | H(46A)-C(46)-H(46B) | 109.5    |
| C(38)-C(37)-C(36) | 120.3(2) | C(43)-C(46)-H(46C)  | 109.4    |
| C(42)-C(37)-C(36) | 120.4(2) | H(46A)-C(46)-H(46C) | 109.5    |
| C(39)-C(38)-C(37) | 124.1(3) | H(46B)-C(46)-H(46C) | 109.5    |
| C(39)-C(38)-O(6)  | 120.0(2) | C(34)-C(47)-H(47A)  | 109.5    |
| C(37)-C(38)-O(6)  | 115.8(2) | C(34)-C(47)-H(47B)  | 109.4    |
| C(38)-C(39)-C(40) | 114.4(3) | H(47A)-C(47)-H(47B) | 109.5    |
| C(38)-C(39)-C(49) | 126.9(3) | C(34)-C(47)-H(47C)  | 109.5    |
| C(40)-C(39)-C(49) | 118.7(3) | H(47A)-C(47)-H(47C) | 109.5    |
| C(41)-C(40)-C(39) | 124.3(3) | H(47B)-C(47)-H(47C) | 109.5    |
| C(41)-C(40)-H(40) | 117.9    | C(35)-C(48)-H(48A)  | 109.6    |
| C(39)-C(40)-H(40) | 117.8    | C(35)-C(48)-H(48B)  | 109.4    |
| C(40)-C(41)-C(42) | 119.2(3) | H(48A)-C(48)-H(48B) | 109.5    |
| C(40)-C(41)-C(53) | 120.2(3) | C(35)-C(48)-H(48C)  | 109.5    |
| C(42)-C(41)-C(53) | 120.6(3) | H(48A)-C(48)-H(48C) | 109.5    |
| C(41)-C(42)-C(37) | 118.5(3) | H(48B)-C(48)-H(48C) | 109.5    |
| C(41)-C(42)-C(54) | 120.1(3) | C(50)-C(49)-C(52)   | 110.1(5) |
| C(37)-C(42)-C(54) | 121.3(3) | C(50)-C(49)-C(51)   | 107.9(6) |
| C(45)-C(43)-C(46) | 108.0(3) | C(52)-C(49)-C(51)   | 104.7(5) |
| C(45)-C(43)-C(44) | 109.9(3) | C(50)-C(49)-C(39)   | 114.6(3) |

|                     |           |                     |           |
|---------------------|-----------|---------------------|-----------|
| C(52)-C(49)-C(39)   | 111.5(3)  | C(55)-C(56)-Rh(1)   | 72.27(18) |
| C(51)-C(49)-C(39)   | 107.5(3)  | C(55)-C(56)-H(56A)  | 119(2)    |
| C(49)-C(50)-H(50A)  | 109.4     | Rh(1)-C(56)-H(56A)  | 101(2)    |
| C(49)-C(50)-H(50B)  | 109.3     | C(55)-C(56)-H(56B)  | 116(2)    |
| H(50A)-C(50)-H(50B) | 109.5     | Rh(1)-C(56)-H(56B)  | 106(2)    |
| C(49)-C(50)-H(50C)  | 109.8     | H(56A)-C(56)-H(56B) | 123(3)    |
| H(50A)-C(50)-H(50C) | 109.5     |                     |           |
| H(50B)-C(50)-H(50C) | 109.5     |                     |           |
| C(49)-C(51)-H(51A)  | 109.4     |                     |           |
| C(49)-C(51)-H(51B)  | 109.6     |                     |           |
| H(51A)-C(51)-H(51B) | 109.5     |                     |           |
| C(49)-C(51)-H(51C)  | 109.4     |                     |           |
| H(51A)-C(51)-H(51C) | 109.5     |                     |           |
| H(51B)-C(51)-H(51C) | 109.5     |                     |           |
| C(49)-C(52)-H(52A)  | 109.5     |                     |           |
| C(49)-C(52)-H(52B)  | 109.4     |                     |           |
| H(52A)-C(52)-H(52B) | 109.5     |                     |           |
| C(49)-C(52)-H(52C)  | 109.5     |                     |           |
| H(52A)-C(52)-H(52C) | 109.5     |                     |           |
| H(52B)-C(52)-H(52C) | 109.5     |                     |           |
| C(41)-C(53)-H(53A)  | 109.4     |                     |           |
| C(41)-C(53)-H(53B)  | 109.5     |                     |           |
| H(53A)-C(53)-H(53B) | 109.5     |                     |           |
| C(41)-C(53)-H(53C)  | 109.5     |                     |           |
| H(53A)-C(53)-H(53C) | 109.5     |                     |           |
| H(53B)-C(53)-H(53C) | 109.5     |                     |           |
| C(42)-C(54)-H(54A)  | 109.6     |                     |           |
| C(42)-C(54)-H(54B)  | 109.5     |                     |           |
| H(54A)-C(54)-H(54B) | 109.5     |                     |           |
| C(42)-C(54)-H(54C)  | 109.4     |                     |           |
| H(54A)-C(54)-H(54C) | 109.5     |                     |           |
| H(54B)-C(54)-H(54C) | 109.5     |                     |           |
| C(56)-C(55)-Rh(1)   | 72.41(18) |                     |           |
| C(56)-C(55)-H(55A)  | 121.6(19) |                     |           |
| Rh(1)-C(55)-H(55A)  | 104.7(17) |                     |           |
| C(56)-C(55)-H(55B)  | 122(2)    |                     |           |
| Rh(1)-C(55)-H(55B)  | 99.9(18)  |                     |           |
| H(55A)-C(55)-H(55B) | 116(3)    |                     |           |
